# Supplementary material for: Abundance of type I toxin–antitoxin systems in bacteria: searches for new candidates and discovery of novel families
Source: PubMed Central journal article supplement — Nucleic Acids Res. 2010 Feb 15;38(11):3743–59. doi: 10.1093/nar/gkq054 (PMC2887945; doi:10.1093/nar/gkq054), 2010-02-15
Supplement: gkq054_1.pdf [file gkq054_1.pdf]

**Supplementary Figure S1.** Multiple alignment of type I toxin families. (A) LdrD/Fst; (B) EHEC; (C) YhzE; (D) TxpA; (E) Hok/Gef; (F) Ibs; (G) TisB; (H) ShoB. Multiple alignments of protein sequences for each family were constructed by using MUSCLE program (1). Consensus was constructed using CONSENSUS program available on-line (<http://coot.embl.de/Alignment//consensus.html>). Proteins for type I toxins analyzed experimentally in this work are highlighted by red. Additional YhzE homologs present in *B. subtilis subsp. subtilis str.* 168 are underlined, and the putative phage YhzE homolog is in blue lettering. The color coding of amino acids is the following: hydrophobic amino acids (AVLIM) are blue, small amino acids (G) – green; aromatic amino acids (FYW) – magenta; polar amino acids (DEKR) – red; Unaligned N-terminal regions are generally non colored.

# Supplementary Figure S1

A

## LdrD/Fst (all)

```
SE_SL483_448875_Salmonella enterica SL483 -----MTLTELSITVWHDLAAPTLVGIATGLFLGWHRRK-----
*49176087_Escherichia coli str. K-12 substr. MG1655 -----MTLAQFAMIFWHDLAAPILAGIITAAIVSWWRNRK-----
49176088_Escherichia coli str. K-12 substr. MG1655 -----MTLAQFAMTFWHDLAAPILAGIITAAIVGWWRNRK-----
49176089_Escherichia coli str. K-12 substr. MG1655 -----MTLAQFAMIFWHDLAAPILAGIITAAIVSWWRNRK-----
49176368_Escherichia coli str. K-12 substr. MG1655 -----MTFAELGMAFWHDLAAPVIAGILASMIWNLNKRR-----
EC_CFT073_1509044_Escherichia coli CFT073 -----MTLAQFAVIFWHDLAAPILAGIITAAIVGWWRNRK-----
EC_UMN026_1524026_Escherichia coli UMN026 -----MTLAQFAMIFWHDLAAPILAGIITAAIVSWWRNRK-----
SD_Sd197_1171258_Shigella dysenteriae Sd197 -----MTLAQFAMIFWHDLAAPILAGIITVAIVGWWRNRK-----
EC_IAI39_1621258_Escherichia coli IAI39 -----MTLAQFAMIFWHDLAAPILAGIITAVIVSWWRNRK-----
SF_2457T_1265871_Shigella flexneri 2a str. 2457T -----MTLAQFAMTFWHDLAAPILAGIITAAIVSWWRNRK-----
EC_IAI39_1620723_Escherichia coli IAI39 -----MTLTQFAMTFWHDLAAPILAGIITAAIVSWWRNRK-----
EC_55989_1365538_Escherichia coli 55989 -----MTLAQFAMTFWHDLAAPILAGIITAAIVSWWRNRK-----
EC_ED1a_1351568_Escherichia coli ED1a -----MTLAQFAMTFWHDLAAPILAGIITAAIVGWWRNRK-----
*SB_308394_1259350_Shigella boydii CDC 3083-94 -----MTLAKFAMIFWHDLAAPILAGIITAAIVGWWRNRK-----
EC_HS_1317712_Escherichia coli HS -----MTLAQFAMIFWDDLAAPILAGIITAAIVGWWRNRK-----
EC_APEC01_1282999_Escherichia coli APEC 01 -----MTLAQFAMIFWHDLAAPILAGIITAAIVGWWRNRK-----
SE_CT_02021853_3848063_Salmonella enterica CT_02021853 -----MTLTQLGVVFWHDLAAPIIAGIITASVIVNWLDRK-----
*SE_z4z23_3940185_Salmonella enterica arizonae -----MTLTQLGVAFWHDLAAPIIAGIITASLIVNWLDRK-----
SE_SC-B67_3758987_Salmonella enterica SC-B67 -----MP-LQQGGYMTLTQLGVAFWHDLAAPIIAGIITASVIVNWLDRK-----
SE_AKU12601_3597279_Salmonella enterica AKU_12601 -----MP-LQQGGYMTLTQLGVAFWHDLAAPIIAGIITASVIVNWLDRK-----
EC_IAI39_4212812_Escherichia coli IAI39 -----MTLAEELGMAFWHDLAAPVIAGILASLIVNSLNKRR-----
EC_SMS35_3925001_Escherichia coli SMS-3-5 -----MTLAEELGMAFWHDLAAPVIAGILASLIVNWLNRK-----
EC_APEC01_4000357_Escherichia coli APEC 01 -----MTLAEELGMAFWHDLAAPVIAGILASMIWVNLNRK-----
*EC_E234869_3946592_Escherichia coli O127:H6 str. E2348/69 -----MTLAEELGMAFWHDLAVPVIAGILASMIWVNLNRK-----
SF_8401_3620153_Shigella flexneri 5 str. 8401 -----MTFAELGMAFWHDLAAPVIAGILASMIWVNLNRK-----
EC_UMN026_4161915_Escherichia coli UMN026 -----MTLAEELGMAFWHDLAAPVIAGILASMIWVNLKQK-----
EC_IAI1_3764984_Escherichia coli IAI1 -----MTLAEELGMAFWHDLAAPVIAGILASMIWVNLNRK-----
SS_Ss046_4048784_Shigella sonnei Ss046 -----MTLAEELGMTFWHDLAAPVIAGILASMIWVNLNRK-----
SS_Ss046_4049750_Shigella sonnei Ss046 -----MNNFLCYTQIGDLPKREVHMHYEIVTKILVPIFVGIIVLKLVTIWLEKQNEE-----
SS_Ss046_4049750_Shigella sonnei Ss046 -----MNNFLCYTQIGDLPKREVHMHYEIVTKILVPIFVGIIVLKLVTIWLEKQNEE-----
224545267_Bryantella formatexigens DSM 14469 MFIEILFSICYNSTVTASDTRYGREVLCEMFALSFIIAVTAGVVCHYVIKWLGDGK-----
*Streptococcus pneumoniae R6 1965404..1965499 -----MSLIIEALTTIADVIAIGIILYFVCKRNLDSKE-----
*Streptococcus pneumoniae R6 1965747..1965842 -----MSLIPELALTTIADVIAIGIILYFVCKRNLDSKE-----
GC_1317888_Streptococcus equi subsp. zooepidemicus -----MDAFTSFLVAVSSGIVILFEYVNLNRD-----
GC_1418301_Staphylococcus aureus RF122 -----LLIFVHIIAPVIVSGCAVAYTYWLSKRN-----
GC_1491108_Lactobacillus helveticus DPC 4571 -----SISLIVAPIIVGIVLALFNHNLDRD-----
GC_1516065_Macrocooccus caseolyticus JCSC5402 -----MLTIFVQVLCISIVSGCIVALFESHWLSLNK-----
GC_1570450_Staphylococcus epidermidis ATCC 12228 -----MILDIFVHIITTVISGCIVALFTHWLQRN-----
GC_1702840_Staphylococcus saprophyticus subsp. ATCC 15305 -----MSEIFVNIIMTTAASGCLVALFAHWLRRN-----
GC_1832812_Staphylococcus aureus subsp. aureus NCTC 8325 -----MLIFVHIIAPVIVSGCAIAFFSYWLSRRN-----
GC_1856538_Staphylococcus aureus subsp. aureus N315 -----MLIFVHIIAPVIVSGCAIAFFSYWLSRRN-----
GC_1873359_Staphylococcus aureus subsp. aureus MSSA476 -----MLIFVHIIAPVIVSGCAIAFFSYWLSRRN-----
```

GC\_1879142\_Staphylococcus aureus subsp. aureus ED98 -----MLIFVHIIALVIGSCAIAFFSYWLSRRN-----  
GC\_1889650\_Staphylococcus aureus subsp. aureus str. Newman -----MLIFVHIIAPVIGSCAIAFFSYWLSRRN-----  
GC\_1894024\_Staphylococcus aureus subsp. aureus MW2 -----MLIFVHIIAPVIGSCAIAFFSYWLSRRN-----  
GC\_1906941\_Staphylococcus aureus subsp. aureus COL -----MLIFVHIIAPVIGSCAIAFFFLAK-----  
GC\_1929120\_Staphylococcus aureus subsp. aureus USA300\_FPR3757 -----MLIFVHIIAPVIGSCAIAFFSYWLSRRN-----  
GC\_1929870\_Staphylococcus aureus subsp. aureus USA300\_TCH1516 -----MLIFVHIIAPVIGSCAIAFFSYWLSRRN-----  
GC\_1934331\_Staphylococcus aureus subsp. aureus Mu50 -----MLIFVHIIAPVIGSCAIAFFSYWLSRRN-----  
GC\_1935730\_Staphylococcus aureus subsp. aureus Mu3 -----MLIFVHIIAPVIGSCAIAFFSYWLSRRN-----  
GC\_1965404\_Streptococcus pneumoniae R6 -----MSLIEELALTIADVIAGIILYFVCRWLDGKE-----  
GC\_1965747\_Streptococcus pneumoniae R6 -----MSLIEELALTIADVIAGIILYFVCKWLDGKK-----  
GC\_1972693\_Staphylococcus aureus subsp. aureus MRSA252 -----MLIFVHIIAPVIGSCAIAFFSYWLSRRN-----  
GC\_1972906\_Streptococcus pneumoniae D39 -----MSLIEELALTIADVIAGIILYFVCRWLDGKE-----  
GC\_1973249\_Streptococcus pneumoniae D39 -----MSLIEELALTIADVIAGIILYFVCKWLDGKK-----  
GC\_1979535\_Staphylococcus aureus subsp. aureus JH1 -----MLIFVHIIAPVIGSCAIAFFSYWLSRRN-----  
GC\_1979661\_Staphylococcus aureus subsp. aureus JH9 -----MLIFVHIIAPVIGSCAIAFFSYWLSRRN-----  
GC\_2003059\_Streptococcus pneumoniae G54 -----MSLIXELALTIADVIAGIILYFVCKWLDGKK-----  
GC\_2036109\_Streptococcus pneumoniae Taiwan19F-14 -----MSLIEELALTIADVIAGIILYFVCRWLDGKE-----  
GC\_2036452\_Streptococcus pneumoniae Taiwan19F-14 -----MSLIEELALTIADVIAGIILYFVCKWLDGKK-----  
GC\_2039022\_Streptococcus pneumoniae P1031 -----MSLIEELALTIADVIAGIILYFVCRWLDGKK-----  
GC\_2039365\_Streptococcus pneumoniae P1031 -----MSLIEELALTIADVIAGIILYFVCKWLDGKK-----  
GC\_2047370\_Streptococcus pneumoniae JJA -----MSLIEELALTIADVIAGIILYFVCRWLDGKK-----  
GC\_2047713\_Streptococcus pneumoniae JJA -----MSLIEELALTIADVIAGIILYFVCKWLDGKK-----  
GC\_2086132\_Streptococcus pneumoniae TIGR4 -----MSLIEELALTIADVIAGIILYFVCRWLDGKE-----  
GC\_2086475\_Streptococcus pneumoniae TIGR4 -----MSLIEELALTIADVIAGIILYFVCKWLDGKK-----  
GC\_2111780\_Streptococcus pneumoniae 70585 -----MSLIEELALTIADVIAGIILYFVCRWLDGKE-----  
GC\_2112123\_Streptococcus pneumoniae 70585 -----MSLIEELALTIADVIAGIILYFVCKWLDGKK-----  
GC\_211586\_Streptococcus mutans UA159 -----MWHNFFIYIVAPIFVGVVLALESEWLDKDD-----  
GC\_2135898\_Streptococcus pneumoniae CGSP14 -----MSLIEELALTIADVIAGIILYFVCRWLDGKK-----  
GC\_2136241\_Streptococcus pneumoniae CGSP14 -----MSLIEELALTIADVIAGIILYFVCKWLDGKK-----  
GC\_2147931\_Streptococcus pneumoniae ATCC 700669 -----MSLIEELALTIADVIAGIILYFVCRWLDGKE-----  
GC\_2148274\_Streptococcus pneumoniae ATCC 700669 -----MSLIEELALTIADVIAGIILYFVCKWLDGKK-----  
GC\_2171141\_Streptococcus pneumoniae Hungary19A-6 -----MSLIEELALTIADVIAGIILYFVCRWLDGKE-----  
GC\_2171484\_Streptococcus pneumoniae Hungary19A-6 -----MSLIEELALTIADVIAGIILYFVCKWLDGKK-----  
GC\_2251172\_Staphylococcus epidermidis RP62A -----MLEILVHITTTVINGCIVALFTHWLNKRN-----  
GC\_2256364\_Staphylococcus epidermidis ATCC 12228 -----MLIFVHIIAPVIGSCAIAFFTHWLNKRN-----  
GC\_2258937\_Staphylococcus epidermidis RP62A -----LLIIFVHIIAPVIGSCAVAYTYWLSKRN-----  
GC\_227302\_Streptococcus pneumoniae ATCC 700669 -----MMELVLKTIIGPIVVGVLRIVDKWLNKDK-----  
GC\_228970\_Streptococcus pneumoniae G54 -----MMELVLKTIIGPIVVGVLRIVDKWLNKDK-----  
GC\_231905\_Streptococcus pneumoniae R6 -----MMELVLKTIIGPIVVGVLRIVDKWLNKDK-----  
GC\_231906\_Streptococcus pneumoniae D39 -----MMELVLKTIIGPIVVGVLRIVDKWLNKDK-----  
GC\_237220\_Streptococcus pneumoniae JJA -----MMELVLKTIIGPIVVGVLRIVDKWLNKDK-----  
GC\_2444003\_Staphylococcus aureus RF122 -----MFNLLINIMTSAISGCLVAFFAHWRTRN-----  
GC\_2484026\_Staphylococcus aureus subsp. aureus MSSA476 -----NLLIDIMTSALSGCLVAFFAHWRTRN-----  
GC\_2491397\_Staphylococcus aureus subsp. aureus N315 -----NLLINIMTSAISGCLVAFFAHWRTRN-----  
GC\_2491960\_Staphylococcus aureus subsp. aureus COL -----NLLINIMTSAISGCLVAFFAHWRTRN-----  
GC\_2502625\_Staphylococcus aureus subsp. aureus NCTC 8325 -----NLLINIMTSAISGCLVAFFAHWRTRN-----  
GC\_2504858\_Staphylococcus aureus subsp. aureus MW2 -----NLLIDIMTSALSGCLVAFFAHWRTRN-----  
GC\_2508137\_Staphylococcus aureus subsp. aureus ED98 -----NLLINIMTSAISGCLVAFFAHWRTRN-----  
GC\_253506\_Streptococcus pneumoniae CGSP14 -----MMELVLKTIIGPIVVGVLRIVDKWLNKDK-----  
GC\_2555522\_Staphylococcus aureus subsp. aureus USA300\_FPR3757 -----NLLINIMTSAISGCLVAFFAHWRTRN-----  
GC\_2560457\_Staphylococcus aureus subsp. aureus str. Newman -----NLLINIMTSAISGCLVAFFAHWRTRN-----

GC\_2562577\_Staphylococcus aureus subsp. aureus Mu50 -----NLLINIMTSALSGCLVAFFAHWRTRN-----  
GC\_2564215\_Staphylococcus aureus subsp. aureus Mu3 -----NLLINIMTSALSGCLVAFFAHWRTRN-----  
GC\_258421\_Streptococcus pneumoniae P1031 -----MMELVLKTIIGPIVVGVLRLVDRKLNKDK-----  
GC\_2592712\_Staphylococcus aureus subsp. aureus JH1 -----NLLINIMTSALSGCLVAFFAHWRTRN-----  
GC\_2592836\_Staphylococcus aureus subsp. aureus JH9 -----NLLINIMTSALSGCLVAFFAHWRTRN-----  
GC\_2596556\_Staphylococcus aureus subsp. aureus MRSA252 -----NLLIDIMTSALSGCLVAFFAHWRTRN-----  
GC\_264530\_Streptococcus pneumoniae Taiwan19F-14 -----MMELVLKTIIGPIVVGVLRLVDRKLNKDK-----  
GC\_271752\_Streptococcus pneumoniae 70585 -----MMELVLKTIIGPIVVGVLRLVDRKLNKDK-----  
GC\_321727\_Streptococcus pneumoniae Hungary19A-6 -----MMELVLKTIIGPIVVGVLRLVDRKLNKDK-----  
GC\_586686\_Staphylococcus epidermidis RP62A -----LLIIFVHITTTVLSCCIIALFTHWICNCN-----  
GC\_694453\_Staphylococcus epidermidis ATCC 12228 -----LLIIFVHITTTVLSCCIIALFTHWICNCN-----  
GC\_805790\_Streptococcus equi subsp. zooepidemicus MGCS10565 -----MDAFTSLVAVSSGIVILFEYLNLRD-----  
GC\_917116\_Streptococcus thermophilus LMG 18311 -----MMDLLFKTIIGPIVVSIIILRLVDRWLNDR-----  
GC\_943484\_Streptococcus thermophilus LMD-9 -----MMDLLFKTIIGPIVVSIIILRLVDRWLNDR-----  
SP\_SP18BS74\_149006854\_Streptococcus pneumoniae SP18-BS74 -----MSLIEELALTIADVIAGIILYFVCKWLDGKK-----  
SP\_SP14BS69\_149003024\_Streptococcus pneumoniae SP14-BS69 -----MSLIEELALTIITDVIAGIILYFVCKWLDGKK-----  
228003276\_Anaerococcus prevotii DSM 20548 -----MDNLLYSLTVSIVAGVLSHYICKWLDGNGKDSN-----  
228003950\_Anaerococcus prevotii DSM 20548 -----MIDPCQGLLYSLIVAIMANVISHYICKWLDSEDE-----  
167747809\_Anaerostipes caccae DSM 14662 -----MSRNKIYNEIAVDSFQLKGGTVEYILRFLMSVSISSIVNYYIHKWLDHRRKDS-----  
229827833\_Abiotrophia defectiva ATCC 49176 -----MNLLDLMVSVTAGVATFIICKWLDNRNSNDN-----  
225386962\_Clostridium asparagiforme DSM 15981 -----MQNLLNFLISIMASVAGNYISKWLNDRKDKS-----  
\*160937005\_Clostridium bolteae ATCC BAA-613 -----MSDVLFVAVMASVAGYYICKWLDNRKDKS-----  
224389231\_Clostridiales bacterium 1\_7\_47\_FAA -----MQGIIISFIISVMVNVIAYYICRWLDRKNDDN-----  
228003046\_Anaerococcus prevotii DSM 20548 -----MRFLLDIIFAIIVQVADDCLYKWLKASPSSGY-----  
227486129\_Anaerococcus lactolyticus ATCC 51172 -----MRLLLDIIFAVVIQIIGNYLYKWLKLNKDDN-----  
228003033\_Anaerococcus prevotii DSM 20548 -----MREVFSEILDVIVQVLGNLYKLLDNKLNKDDN-----  
GC\_1683661\_Listeria welshimeri serovar 6b str. SLCC5334 -----LIVIKEILPKNLGFIISLVILSIVLYFVIGKWLNGKE-----  
GC\_1752814\_Listeria monocytogenes HCC23 -----LIVMKEILPKNIGFIISLVILSIVLYFVIGKRLNGKH-----  
GC\_896581\_Listeria innocua Clp11262 -----FIVIKEILPKNIGFIISLVILSIVLYFVIGKRLNGKH-----  
GC\_907654\_Listeria monocytogenes EGD-e -----FIVIKEILPKNIGFIISLVILSIVLYFVIGKRLNGKH-----  
GC\_908009\_Listeria monocytogenes Clp81459 -----FIVIKEILPKNIGFIISLVILSIVLYFVIGKRLNGKH-----  
116873087\_Listeria welshimeri serovar 6b str. SLCC5334 -----LIVIKEILPKNLGFIISLVILSIVLYFVIGKWLNGKEK-----  
224499404\_Listeria monocytogenes Finland 1988 -----FIVIKEILPKNIGFIISLVILSIVLYFVIGKWLNGKHST-----  
46907099\_Listeria monocytogenes str. 4b F2365 -----FIVIKEILPKNIGFIISLVILSIVLYFVIGKRLNGKHSR-----  
SP\_SP19BS75\_149011128\_Streptococcus pneumoniae SP19-BS75 -----MMDTILKTIIGPIVVGVLRLVDRKLNKDK-----  
SP\_SP9BS68\_148993415\_Streptococcus pneumoniae SP9-BS68 -----MMELILKTIIGPIVVGVLRLADKWLKDK-----  
SP\_CGSP14\_182683238\_Streptococcus pneumoniae CGSP14 -----MMELVLKTIIGPIVVGVLRLVDRKLNKDK-----  
ST\_CNZR1066\_55822971\_Streptococcus thermophilus CNZR1066 -----MMDLLFKTIIGPIVVSIIILRLVDRWLNDRDYC-----  
VP\_2008\_227371732\_Veillonella parvula DSM 2008 -----MQELFYALWGTLLAPIIVALVVTYSYWLNNKNNK-----  
\*SA\_Mu50\_14141832\_Staphylococcus aureus subsp. aureus Mu50 -----MFSIIFVSVIAPIIIVGVIIITLFSHWLNRRDKQ-----  
SH\_15305\_73662179\_Staphylococcus saprophyticus ATCC 15305 -----MCITLFTVFIAPIVVGIVVTLFSYWLNNRD-----  
SA\_COL\_57650976\_Staphylococcus aureus subsp. aureus COL -----MFNLLINIMTSAISGCLVAFFAHWRTRNNKGGDK-----  
SA\_RP62A\_57865642\_Staphylococcus epidermidis RP62A -----MMLIFVHIIAPVISGCAIAFTHWLSKCNK-----  
SH\_15305\_73663746\_Staphylococcus saprophyticus ATCC 15305 -----MLMIFVHIIAPVISGCAVAYTYWLSKRNK-----  
SAp\_17227202\_Staphylococcus aureus -----MLIIFVHIIAPVISGCAVAYTYWLSKRNK-----  
SAp\_90969155\_Staphylococcus aureus -----MFTDGIIESPISQASIDEERRCITLLIIFVHIIPVISGCAVAYTYWLSKRNK-----  
SA\_N315\_16119207\_Staphylococcus aureus subsp. aureus N315 -----MFTDGIIESPISQASIDEERRCITLLIIFVHIIAPVISGCAVAYTYWLSKRNK-----  
SA\_MRSA252\_49482916\_Staphylococcus aureus MRSA252 -----MRFMNEILVHIMTTAISGCLVTLFGYWLHKRDKK-----  
SA\_MN8\_227557251\_Staphylococcus aureus subsp. aureus MN8 -----MNEILVHIMTTAISGCLVTLFGYWLHKRDKK-----  
SAp\_161598529\_Staphylococcus aureus -----MLESSISQSTWRREVRFMNEILVHIMTTVISGCLVTLFGYWLHKRDKK-----  
SA\_TCH959\_161508264\_Staphylococcus aureus USA300\_TCH959 -----MNEILVHIMTTVISGCLVTLFGYWLHKRDKK-----

```

SC_SK14_223043577_Staphylococcus capitis SK14 -----MTREGGAYMLFDIFVHIMATATSGCIVALFAHWRTRNDKRRK---
SH_JCSC1435_70726410_Staphylococcus haemolyticus JCSC1435 -----MADILVHIATVTSGCIVTLFSYWLNRNRNNK-----
SA_12228_27468440_Staphylococcus epidermidis ATCC 12228 -----MILDFVHIITTVISGCIVALFTHWLRQRNDKHR---
SH_JCSC1435_70727615_Staphylococcus haemolyticus JCSC1435 -----MVEALVHITTTVISGCIVALFTYWLTRNRNNKKK---
SH_JCSC1435_70727294_Staphylococcus haemolyticus JCSC1435 -----MLEILVHITTTVISGCIIALFTHWLRNRNRNNK-----
SAP_33416263_Staphylococcus aureus -----MLEILVHITTTVISGCIIALFTHWLRNRNRNNK-----
SH_JCSC1435_70727301_Staphylococcus haemolyticus JCSC1435 -----MLEIFVHITTTVISGCIIALFTHWLRNRKKK-----
SH_JCSC1435_70727603_Staphylococcus haemolyticus JCSC1435 -----MLEILVHITTTVISGCIIALFTHWLRNRKDK-----
LC_334_116494134_Lactobacillus casei ATCC 334 -----MLKDLFTVVVGPVVVGVIIELIKRWLDLRQLL-----
LC_334_116496109_Lactobacillus casei ATCC 334 -----MLRDEFFQIIAPLLVGVMTLVDHNLDDGGQ-----
LC_BL23_191639722_Lactobacillus casei BL23 -----MIDFLNQIIAPLIVGVVLLLEHRLNDRR-----
LC_18071178_Lactobacillus curvatus -----MLKSIPTLLIAPVLAGIATSLFDHNLDDQGRK-----
LG_JVV03_227521224_Lactobacillus gasseri JV-V03 -----MKEFLTLLVVAPILVGMVKSFLFDHNLDDRRNNKKHK-
*LG_MV22_226819732_Lactobacillus gasseri MV-22 -----MKDFLTLVVAPIVVEIVKSLFDHNLDDRHNNKKH--
*6114824|Bacil|Enterococcus faecalis plasmid pAD1 -----MKDLSLVIAPIFVGLVLEMSRVLDEEDDSRK---
227556034|Bacil|Enterococcus faecalis HH22 -----MRQLASIGGVLFVKDLSLVIAPIFVGLVLEMSRVLDEEDDSRK---
29375045|Bacil|Enterococcus faecalis V583 -----MNNFLCYTQIGDLPRKEVHHMYEIVTKILVPIFVGLVLEMSRVLDEEDDSRK---
consensus/90% .....h..hhhplhsslhshhhh.hh..Whpppp..

```

## B

### EHEC (all)

|                                         |         |         |           |                                        |
|-----------------------------------------|---------|---------|-----------|----------------------------------------|
| MDSL <b>LTQ</b> KLTVLIAVLELLVALLRLIDLLK | 2954068 | 2953982 | NC_002655 | <b>Escherichia coli O157:H7 EDL933</b> |
| MD <b>TLTQ</b> KLTVLIAVLELLVALLRLIDLLK  | 2953459 | 2953373 | NC_002655 | <b>Escherichia coli O157:H7 EDL933</b> |
| MDSL <b>LTQ</b> KLTVLIAVLELLVALLRLIDLLK | 2883837 | 2883751 | NC_002695 | Escherichia coli O157:H7 str. Sakai    |
| MD <b>TLTQ</b> KLTVLIAVLELLVALLRLIDLLK  | 2883228 | 2883142 | NC_002695 | Escherichia coli O157:H7 str. Sakai    |
| MD <b>TLTQ</b> KLTVLIAVLELLVALLRLIDLLK  | 2213607 | 2213521 | NC_004337 | Shigella flexneri 2a str. 301          |
| MD <b>TLTQ</b> KLTVLIAVLELLVALLRLIDLLK  | 2495866 | 2495780 | NC_004431 | Escherichia coli CFT073                |
| MD <b>TLTQ</b> KLTVLIAVLELLVALLRLIDLLK  | 2194355 | 2194269 | NC_004741 | Shigella flexneri 2a str. 2457T        |
| MD <b>TLTQ</b> KLTVLIAVLELLVALLRLIDLLK  | 971748  | 971662  | NC_007613 | Shigella boydii Sb227                  |
| MD <b>TLTQ</b> KLTVLIAVLELLVALLRLIDLLK  | 2345389 | 2345303 | NC_007946 | Escherichia coli UTI89                 |
| MD <b>TLTQ</b> KLTVLIAVLELLVALLRLIDLLK  | 2245050 | 2244964 | NC_008253 | Escherichia coli 536                   |
| MD <b>TLTQ</b> KLTVLIAVLELLVALLRLIDLLK  | 2318165 | 2318079 | NC_008563 | Escherichia coli APEC O1               |
| MD <b>TLTQ</b> KLTVLIAVLELLVALLRLIDLLK  | 2386542 | 2386456 | NC_009801 | Escherichia coli E24377A               |
| MD <b>TLTQ</b> KLTVLIAVLELLVALLRLIDLLK  | 2385934 | 2385848 | NC_009801 | Escherichia coli E24377A               |
| MD <b>TLTQ</b> KLTVLIAVLELLVALLRLIDLLK  | 936559  | 936645  | NC_010498 | Escherichia coli SMS-3-5               |
| MDSL <b>LTQ</b> KLTVLIAVLELLVALLRLIDLLK | 2880648 | 2880562 | NC_011353 | Escherichia coli O157:H7 str. EC4115   |
| MD <b>TLTQ</b> KLTVLIAVLELLVALLRLIDLLK  | 2880039 | 2879953 | NC_011353 | Escherichia coli O157:H7 str. EC4115   |
| MD <b>TLTQ</b> KLTVLIAVLELLVALLRLIDLLK  | 2459136 | 2459050 | NC_011415 | Escherichia coli SE11                  |
| MD <b>TLTQ</b> KLTVLIAVLELLVALLRLIDLLK  | 2458528 | 2458442 | NC_011415 | Escherichia coli SE11                  |
| MD <b>TLTQ</b> KLTVLIAVLELLVALLRLIDLLK  | 2334978 | 2334892 | NC_011601 | Escherichia coli O127:H6 str. E2348/69 |
| MD <b>TLTQ</b> KLTVLIAVLELLVALLRLIDLLK  | 2258771 | 2258685 | NC_011740 | Escherichia fergusonii ATCC 35469      |
| MD <b>TLTQ</b> KLTVLIAVLELLVALLRLIDLLK  | 2258163 | 2258077 | NC_011740 | Escherichia fergusonii ATCC 35469      |
| MD <b>TLTQ</b> KLTVLIAVLELLVALLRLIDLLK  | 2264582 | 2264496 | NC_011741 | Escherichia coli IAI1                  |
| MD <b>TLTQ</b> KLTVLIAVLELLVALLRLIDLLK  | 2263974 | 2263888 | NC_011741 | Escherichia coli IAI1                  |
| MD <b>TLTQ</b> KLTVLIAVLELLVALLRLIDLLK  | 2241213 | 2241127 | NC_011742 | Escherichia coli S88                   |
| MD <b>TLTQ</b> KLTVLIAVLELLVALLRLIDLLK  | 2423648 | 2423562 | NC_011745 | Escherichia coli ED1a                  |
| MD <b>TLTQ</b> KLTVLIAVLELLVALLRLIDLLK  | 947153  | 947239  | NC_011750 | Escherichia coli IAI39                 |
| MD <b>TLTQ</b> KLTVLIAVLELLVALLRLIDLLK  | 2506708 | 2506622 | NC_011751 | Escherichia coli UMN026                |
| MD <b>TLTQ</b> KLTVLIAVLELLVALLRLIDLLK  | 2506100 | 2506014 | NC_011751 | Escherichia coli UMN026                |

C

YhzE

```
229101755|Bacil|Bacillus_cereus_Rock3-28-----MVVVVAARGEAGKSGFPFIILLFIVLIIIVGVS YIGLGF-----
229171811|Bacil|Bacillus_cereus_MM3VKATYNNKEDIPMGLGKGGSGGTGGGEAGQDKSVSSGYIVLIVLFIVLIVVGVYNGINF-----
229095655|Bacil|Bacillus_cereus_Rock3-29VKAIYNNKEDVHMLGKGGSGGTG---GGEAGQAGKSGFPFIIVLFIVLIIIVGASYSGLGF-----
229068710|Bacil|Bacillus_cereus_F65185-----MGLGGNGSGSGSGNGGGE-----AGQAGKSGFSLIIVLFIVLIIIVGVS YIGLGF-----
89100821|Bacil|Bacillus_sp-_NRR_L_B-14911---MYYPYPYPPPPVPYRAGG-----AWYALIVVLLILLIVFGGWYYGNC-----
206976537|Bacil|Bacillus_cereus_H3081-97MSDFEGVPYWAYVAYTEKRRGWGMN-----SQLILLLVLFILLVIVGIICL-----
196037222|Bacil|Bacillus_cereus_NVH0597-99-----MGICRIYRKEEGMGMN-----SQLILLLVLFILLVIVGIICL-----
229010457|Bacil|Bacillus_mycooides_DSM_2048-KTMYNDKEDFHMGS GKGGS--GGG-EDGKDGKSGSSGLLLIILLFIVFIIIGASYSVFSF-----
229165990|Bacil|Bacillus_cereus_AH621---MYNDKEDFHMGS GKGSGSGGG-EDGKDGKSGSSGLLLLILLFIVFIIIGASYSVFSF-----
192812183|Bacil|Geobacillus_sp-_Y412MC10-----MSADA-----GYGGRSATFVLVLYILLVILAA GFWI-----
167630710|Clost|Heliobacterium_modesticaldum_Ice1-----MGGSS-----YGFSGSGFVVAGLVIALIIIGA FYPHIVGFGYSGD
192812289|Bacil|Geobacillus_sp-_Y412MC10-----MSGAYGGAWG-----NSVGTILVLFILLVILSAWV-----
167462588|Bacil|Paenibacillus_larvae_BRL-230010-----MGYTAGSYGGGNG-----YGLITSTATILVLFILLVIVRSV LGY-----
167461796|Bacil|Paenibacillus_larvaeBRL-230010-----MSGVGGNGYCG-----FTSTGAILVLFILLVIVSR TFWLY-----
192813911|Bacil|Geobacillus_sp-_Y412MC10-----MSCEGGGY-----GYGNVGIIVLVL FILLVILSTFYI-----
192811952|Bacil|Geobacillus_sp-_Y412MC10-----MSYDKCCYGG-----GYGTSVGIIVLVL FILLVIVLSTFWI-----
169190051|Bacil|Paenibacillus_sp-_JDR-2-----MSEIHVSPVNDHR-----GGGFNHMGSILVLFILLVIVCTICGGGLY-----
169185223|Bacil|Paenibacillus_sp-_JDR-2-----MSGY-----VGGVNSTGFILVLFILLV IICGCGFGKFPY-----
169189370|Bacil|Paenibacillus_sp-_JDR-2-----MSYGVGPVAGAGCG-----YGGGSAFGFILVLFILLV IIRSVWL-----
169188819|Bacil|Paenibacillus_sp-_JDR-2-----MSGVY-----GGGVNTVGFILVLFILLV IIRTVCH-----
192808045|Bacil|Geobacillus_sp-_Y412MC10-----MGEVGY-----GGYNSVGA IIVL FILLVITASFWV-----
192812237|Bacil|Geobacillus_sp-_Y412MC10-----MSGVGEYGGGY-----GYGSSVGA IIVL FILLVITRAFI-----
205372673|Bacil|Bacillus_coahuilensis_m4-4-----MVLGT-----GYGSYAILIIVL FILLIILGLAFYPCVGPAAE--
169189592|Bacil|Paenibacillus_sp-_JDR-2-----MSGL-----GHGFNNVGSILVLFILLV IIVCGCGFVGGWGG--
226311789|Bacil|Brevibacillus_brevis_NBRC_100599-----MSTSF CGN-----GFFGDCFAIVLVL FILLVIIGCSCDEC-----
226311290|Bacil|Brevibacillus_brevis_NBRC_100599-----MSA-----GFFDD-FSLILVLFVLLVIVAC SCE-----
226312909|Bacil|Brevibacillus_brevis_NBRC_100599-----MRFFLILFKGVISM-----GFFDDNFALV LVL FVLLTIVACSCDEC-----
226311821|Bacil|Brevibacillus_brevis_NBRC_100599-----MLAKEGKRMSLF-----NGGFDDFAL IIVL FVLLVIVACSCD-----
169826817|Bacil|Lysinibacillus_sphaericus_C3-41QPYGNVGGWNNSYCGNNYSYCGG-----NNSGYGSTFVL IIVL FILLIIVGATYI-----
229543403|Bacil|Bacillus_coagulans_36D1-----MTDGGY-----SMGSSFAL IIVL FILLIIVGAFYMGSSGY-----
229544318|Bacil|Bacillus_sp-_B14905MYYGHEGAYPAYDPCCGYGYGSG---YGWGFAGHRNGFAL IIVL FILLIIGACWIGPN-----
126650401|Bacil|Bacillus_sp-_B14905---MGYGYGGVGNMNNGGCYGG---DNNGSYNGSAFVL IIVL FILLIIVGASFMSGGY-----
56420122|Bacil|Geobacillus_kaustophilus_HTA426---MPYGFYGGWGWGGYGFYPGY-----GGYGYGFVL IIVL FILLIIVGATWC-----
126650221|Bacil|Bacillus_sp-_B14905VGNAGYGSVGNYGCCYSGYGNEYSMGYCMDHGKGNSS FVL IIVL FILLIIVGATFMQKEDC-----
169828252|Bacil|Lysinibacillus_sphaericus_C3-41-----MGYCMDHGKGNSS FVL IIVL FILLIIVGATFMQKEDC-----
239827237|Bacil|Geobacillus_sp-_WCH70---MSFGYGF-GWGGCGCGFHGF---YGGFGHGRS FVL IIVL FILLIIVGSAWF-----
239826324|Bacil|Geobacillus_sp-_WCH70---MGFGCCGFGGYGGFYGFGY-----GGFGHSS FVL IIVL FILLIIVGAA FVY-----
221314202|Bacil|Bacillus_subtilis_NCIB_3610SYIVIRKDENSMYGSYGYGFYGC-----TNTFVL IIVL FILLIIVGAA FIC-----
```

154685616|Bacil|Bacillus\_amyloliquefaciens\_FZB42 -MGFGYGGFGGGYGGYGGCGGYGGG-----YVGGGYGSTFVLVVVLFILLIIVGASFFG-----  
**255767264|Bacil|Bacillus subtilis subsp 168** -MGFGYG-FGGGYGGG-CYGGYAGG-----YGGGYGSTFVLLVLFILLIIVGASFF-----  
**9630273|Caudo|Bacillus phage SPBc2** -----MGFYSGYSGGYSGG-----GYGSSFVLIVVLFILLIIVGATFLY-----  
228990077|Bacil|Bacillus\_pseudomycoides\_DSM\_12442 -----MVPLTQGGNVMGFGGSCG-----GFGGFFALLIVLFILLIIGCSCWGGGFGC---  
15614747|Bacil|Bacillus\_halodurans\_C-125 ---MYGYGYGFPVAGAGYDCGYGYG--PVAGVGHCPKGFALIVVLFILLIIGASWGKC-----  
15613960|Bacil|Bacillus\_halodurans\_C-125 -----MSAPTG-----GYGYSGFALLVLFILLVIIIGASWSGWY-----  
228991022|Bacil|Bacillus\_pseudomycoides\_DSM\_12442 ---YGYGGGYGYSCGGGYGYGGYGG-----GCGYG-GFALLIVLFILLIIGASCCGGFIGC---  
229085235|Bacil|Bacillus\_cereus\_Rock3-44 ---MEQVMWGYYPSSCCGYGGYGG-----GCCGTGSGFALIVVLFILLIIGASCVR-----  
89097803|Bacil|Bacillus\_sp-NRRL\_B-14911 --MNYGYSGYGCDPCYSGGYGYPAY--PVAGAQQGYA-GFALIVVLFILLIIGASCYGKW-----  
52080320|Bacil|Bacillus\_licheniformis\_ATCC\_14580 -----MSGGY-----GHGSGFALIVVLFILLIIGASWFGGGYGGY---  
152975136|Bacil|Bacillus\_cereus\_cytotoxis\_NVH39198 PLYLKCTLGKE--EKIMGYEASGF-----GFSGGFALLVLFILLIIGCSCWGGGFGY---  
229010357|Bacil|Bacillus\_mycoides\_DSM\_2048 ---MDFMEGGVNMGYGGSCGYGGSCG-----GCCGFGGFFALLVLFILLIIVGASWGGGFGC---  
30261724|Bacil|Bacillus\_anthraxis\_str-Ames IVVHELRLTYSKGGTHMSYGGSCA-----GFGGFFALLIVLFILLIIGCSCWGGGYYG---  
89099782|Bacil|Bacillus\_sp-NRRL\_B-14911 -----MSDGGC-----YGGGFALLVLFILLIIGASWYGGGGYGY--  
229541453|Bacil|Bacillus\_coagulans\_36D1 ---MNNILMKQEEVDGMSGGAAYG-----GGFALLVLFILLIIGASWAW-----  
149182279|Bacil|Bacillus\_sp-SG-1 APNVNMAPTAVSPAYTAPGYGYCAP-----ARGYGDVFLIVVLFILLIIVGASFVPKC-----  
15616531|Bacil|Bacillus\_halodurans\_C-125 MVAGVMEEPMPYAAAPAFGYGMPAP-----RKHGHGFVLIIVLFILLIIVGSSFVKC-----  
239827240|Bacil|Geobacillus\_sp-WCH70 -----MMWYYDGYAPHYYGYGYG-----GRFGCSFSLIVVLFILLIIVLA AVR-----  
15615254|Bacil|Bacillus\_halodurans\_C-125 ---MGYYYGYPPFPFPPYRGYCPPY-----GGGFALIVVLFILLIILCGWFK-----  
126650315|Bacil|Bacillus\_sp-B14905 -----MGYCGNVGGIENGGYGGG-----SNNGSTFALIVVLFILLIIVGATFLKREKDC---  
23098568|Bacil|Oceanobacillus\_ihayensis\_HTE831 -----MGKDHGGE-----NFGSAGFALLVLFILLVIIGTAYSGGDKCGGYCG  
56964187|Bacil|Bacillus\_clausii\_KSM-K16 GYGYGGYGYGPEAYGGYGGYGYGCG-----GYGGGRGFALIVVLFILLIIVGASWFGYGGEEQCGP  
**255767463|Bacil|Bacillus subtilis 168** -----MYGYSYGYGFGCG-----TNTFVLIVVLFILLIIVGAAAFIC-----  
**255767336|Bacil|Bacillus subtilis 168** ---MYGYGYGGCCSYGGYGYGGC-----GYGYRTFALIVVLFILLIIVGAAFLGGGCC---  
**16079078|Bacil|Bacillus subtilis 168** -----MGFYSGYSGGYSGG-----GYGSSFVLIVVLFILLIIVGATFLY-----  
**255767745|Bacil|Bacillus subtilis 168** -----MGFYNSGGYSGNSG-----YSNGFGSSFALIVVLFILLIIVGAAIFNY-----  
**255767118|Bacil|Bacillus subtilis 168 (yczM)** -----MSG-----GYGTSFALIVVLFILLIIVGTA FVGGY-----  
**221308193|Bacil|Bacillus subtilis subsp 168** -----MSGYSNCGG-----YGGISSFALIVVLFILLIIVGTA FVGGF-----  
**2|Bacil|Bacillus subtilis 168** -----MG-----EVFAGGFALLVLFILLIIGASWLY-----  
**255767231|Bacil|Bacillus subtilis 168 (yhzE)** -----MS-----GGYSNGFALLVLFILLIIVGAAFIY-----  
161376709|Bacil|Bacillus\_megaterium VLSIYGGENMGFGCCGYGGYGYGGG-----GSGFGSGFALIIVLFILLIIGASC FGGFGGGC---  
206977001|Bacil|Bacillus\_cereus\_H3081-97 ---MSEKCEHRHDDCNRRHGCG-----GGFALLIVLFILLIIGASC FGGGGGGC---  
228918610|Bacil|Bacillus\_thuringiensis\_BGSC\_4CC1 HGISPSFTLLSKGGP IVMGYGGTCG-----EGCGFAGGFALLVLFILLIIGCTFC-----  
196037116|Bacil|Bacillus\_cereus\_W YMRTPLFSLLIKGS IVMGYGGSCG-----EGCGFTGEFALLVLFILLIIGCSCFC-----  
15613742|Bacil|Bacillus\_halodurans\_C-125 -----MS-----VPHHGGFALIVVLFILLVIIGAAWVC-----  
149180386|Bacil|Bacillus\_sp-SG-1 -----MS-----ERGYGAGFALIVVLFILLIIVGAA YVGGGY-----  
239827238|Bacil|Geobacillus\_sp-WCH70 -----MMG-----AGYGGGFALIVVLFILLIIVGCACIGGWGY-----  
56419190|Bacil|Geobacillus\_kaustophilus\_HTA426 -----MS-----APYSGGFALIVVLFILLIIVGCACVIY-----  
15614748|Bacil|Bacillus\_halodurans\_C-125 -----MS-----AGFHGGGFALIVVLFILLVIVGSAFCC-----  
15613741|Bacil|Bacillus\_halodurans\_C-125 -----MS-----GAYHGGFALIVVLFILLVIVGAAWYY-----  
23099284|Bacil|Oceanobacillus\_ihayensis\_HTE831 -----MSG-----GYGYAGGFALIVVLFILLVIVGAAWF-----  
154684872|Bacil|Bacillus\_amyloliquefaciens\_FZB42 -----MSG-----YSGISSFALIVVLFILLVIVGTAYVGGF-----  
15615220|Bacil|Bacillus\_halodurans\_C-125 ---GVGYGAPVGVGYCPPVAGVG-----YGPCKGFALIVVLFILLIIVGASKFGVY-----  
196249221|Bacil|Geobacillus\_sp-G11MC16 -----MS-----AWHGNSFALIVVLFILLIIVGTA FGRYAY-----  
157692134|Bacil|Bacillus\_pumilus\_SAFR-032 GGYGYGYGGGYGGCCYPSYGGGYG-----YGGGRTFALIVVLFILLIIVGAAFLGGGGGCC---





D

TxpA (all)

```
224547544|Clost|Bryantella_formatexigens_DSM_14469      -----MLTLLSIAIALILVAVTFIIGSLGGVAILIVFGDLI---VAVIVIVFIIRLLTKKKQK-----
*227554839|Bacil|Enterococcus_faecalis_HH22            -----MSVEAALGLMIGFATLV---VTIIFVILALVLDNKNRNS-----
29375319|Bacil|Enterococcus_faecalis_V583              -----MFLSVEAALGLMIGFATLV---VTIIFVILALVLDNKNRNS-----
29377545|Bacil|Enterococcus_faecalis_V583              -----MYDGGSELERQVMPMCIRCTLTKGAFFLSIEATLELMISFATLV---ALLIFGILEATKNDKK-----
229548059|Bacil|Enterococcus_faecalis_ATCC_29200       -----MHFNERSIFLSTIEAALELMISFAAFV---ALLIFGILEATKNNKK-----
238857151|Bacil|Enterococcus_faecalis_TUSoD_Ef11        -----MYPMHFNERSIFLSTIEAALELMISFAAFV---ALLIFGILEATKNDKK-----
29377544|Bacil|Enterococcus_faecalis_V583              -----MYPMHFNERSIFLSTIEAALELMISFAAFV---ALLIFGILEATKNNKK-----
15614759|Bacil|Bacillus_halodurans_C-125                -----MTVYETLSIVVQVNSIL---LATLTFVLSLVVFNKKK-----
224544345|Clost|Bryantella_formatexigens_DSM_14469     -----MESTYDGVVASRLILYIGREVAPMTAYEIVSTILAVASLM---VAVGMFVIALLAFLDKRRKKR-----
166031350|Clost|Dorea_formicigenerans_ATCC_27755        -----MLCYDTRDRETKARRLPFFYGGIKHPPNERKEGDAMVTYSDMIQFCIFI---VALVGLCYEIFKGRR-----
49484189|Bacil|Staphylococcus_aureus_aureus_MRSA252    -----MSKLDNRWNLSEYKEVVPVALLKSLERRRRLMITISTMLQFGLFI---IALIGLVIKLIELSNKK-----
88195852|Bacil|Staphylococcus_aureus_aureus_NCTC_8325  -----MDRWLSEYKEVVPVALLKSLERRRRLMITISTMLQFGLFI---IALIGLVIKLIELSNKK-----
66395573|Caudo|Staphylococcus_phage_42E                 -----MLALLKSLERRRRLMITISTMLQFGLFI---IALIGLVIKLIELSNKK-----
221138600|Bacil|Staphylococcus_aureus_subsp-JKD6008     -----MVALLKSLERRRRLMITISTMLQFGLFI---IALIGLVIKLIELSNKK-----
15924937|Bacil|Staphylococcus_aureus_subsp-aureus_Mu50  -----MVALLKSLERRRRLMITISTMLQFGLFI---IALIGLVIKLIELSNKK-----
221310065|Bacil|Bacillus_subtilis_subsp-subtilis_str-168 -----MTVYESLMIMINFGGLILNTVLLIFNIMMIVTSSQKKK-----
146319745|Bacil|Streptococcus_suis_05ZYH33              -----MVMGKSSKSNRKEKLSLSTFEVLTLMFVAGNFV---IALVMLVLELVKTKKITYVNFGEFTVIF-----
22538135|Bacil|Streptococcus_agalactiae_2603V-R         -----MGNSSKSNRKEELDLSLSTFEVLTLMFVAGNFV---IALVMLVLELVKTKK-----
199599144|Bacil|Lactobacillus_rhamnosus_HN001           -----MSVFEALSLVNQVVDNF---MTLIVLVTVLTAENKRRK-----
227517267|Bacil|Enterococcus_faecalis_TX0104            -----MSISTEYERKPYLSALDVIQLIFDFGLYT---IALISLVVTLKDKKK-----
229824502|Clost|Catonella_morbi_ATCC_51271              -----MCIHQNLGRRTLNSAEAVRRLILEFGTFV---IALIGLCHKLFNKHKDKK-----
223934112|Bacil|Streptococcus_suis_89-1591              -----MGNSSKSDGKEEHLTAFEVVTILGFGSFT---IALIGLCYKIFKDNKDKK-----
77411239|Bacil|Streptococcus_agalactiae_CJB111          -----MTAFEVVQIIIGFGSFT---VALIGLCYKIFKDDDKKK-----
225869355|Bacil|Streptococcus_equi_subsp-zoepidemicus   -----MTAFEVVQITLLGSSFT---IALISLCYQIFKDDNKK-----
225871364|Bacil|Streptococcus_equi_subsp-equi_4047     -----MTAFEVVQILLGSSFT---IALISLCYQIFKDDNKK-----
29377818|Bacil|Enterococcus_faecalis_V583              -----MNVLPKSIERRSLLSVSESLQMLLAFGGFT---LTLITIVAILNYKDKKK-----
227555552|Bacil|Enterococcus_faecalis_HH22              -----MCVLPKSQLERGLLSALETIQILILFGMFT---IALIKLIVDLLKNDKKK-----
227550225|Bacil|Enterococcus_faecium_TX1330             -----MKGVSLSAYETIQITILGFGMFT---IALISLVNMLKNDKKK-----
69245599|Bacil|Enterococcus_faecium_DO                 -----MLKSMKGVSLLSAYETIQITILGFGMFT---IALISLVNMLKNDKKK-----
238858600|Bacil|Enterococcus_faecalis_TUSoD_Ef11        -----MHVFPKFRERRGLLSAYETIQITILGFGMFT---IALIALIVKLLKNDKKK-----
29377690|Bacil|Enterococcus_faecalis_V583              -----MHVFPKFTERRGLLSAYETIQITILGFGMFT---IALIALIVKLLKNDKKK-----
194272120|Bacil|Enterococcus_faecalis_OG1RF             -----MSVLPKFTERRGLLSAYETIQITILGFGMFT---IALIALIVKLLKNDKKK-----
238858724|Bacil|Enterococcus_faecalis_TUSoD_Ef11        -----MSVLPKFTERRGLLSAYETIQITILGFGMFT---IALIALIVKLLKNDKKK-----
16079658|Bacil|Bacillus_subtilis_subsp-subtilis_str-168 -----MSTYESLMVMIGFANLIGGIMTWFVISLLTLFMLRKKDTHPIYITVKEK-----
192812442|Bacil|Geobacillus_sp-_Y412MC10                -----MEVKAALTIMFLFGSFT---LALLTYINNNKKIKTHPKVTRRRVWFH-----
192812492|Bacil|Geobacillus_sp-_Y412MC10                -----MEVKDALTIMFLFGTFI---IALLTYINNNKRR-----
157693513|Bacil|Bacillus_pumilus_SAFR-032               -----MSTFQALMLLAFSGSFT---ITLLTYIDKK-----
226309994|Bacil|Brevibacillus_brevis_NBRC_100599        -----MSKNEGVMLVEVYQALTLFMFGMFI---LALLTYLKKK-----
167462097|Bacil|Paenibacillus_larvae_larvae_BRL-230010  -----MKQAIYAYVGGRITSKGGDAMEFQALQLMFLFGMFI---LAL-TFTRKMK-----
167461049|Bacil|Paenibacillus_larvae_larvae_BRL-230010  -----METFQALQLMFLFGMFI---LALLTFIQMK-----
167461297|Bacil|Paenibacillus_larvae_larvae_BRL-230010  -----METFQALQLMFLFGMFI---LALLTFIQK-----
167461307|Bacil|Paenibacillus_larvae_larvae_BRL-230010  -----METFQALQLMFLFGMFI---LALLTFIQK-----
73662916|Bacil|Staphylococcus_saprophyticus_subsp-      -----MVSIIEVPYMLGFGTFI---VTLGIAITIVKSSHKK-----
149182144|Bacil|Bacillus_sp-_SG-1                       -----MGQRLILPRKGGDTLMVAIEDVLQIMIAFGTLV---AAIIAAATEKKK-----
205375278|Bacil|Bacillus_coahuilensis_m4-4              -----MLTISDVLQILGFGSLL---LAGVSLVVAIIAVTLKK-----
21282640|Bacil|Staphylococcus_aureus_subsp-aureus_MW2   -----MISIANALHMLLSFGMFI---VTFIGIVVAIINLSNKK-----
```

|                                                           |                                                                         |
|-----------------------------------------------------------|-------------------------------------------------------------------------|
| 227432872 Bacil Leuconostoc_mesenteroides_subsp-_cremoris | -----MSISDALLVMFAFGGFI---ISILTFVLLIEKISKNNRILIFG----                    |
| 50915151 Bacil Streptococcus_pyogenes_MGAS10394           | -----MSGGGAYVCKSQPKERRRQGLSVYETLTLMIAFGTLI---VAIMNNKKNK-----            |
| 199599727 Bacil Lactobacillus_rhamnosus_HN001             | -----MSVADALMLMLVFGDFL---LSLIALIITIMLIIQDNQKDRR-----                    |
| 199599589 Bacil Lactobacillus_rhamnosus_HN001             | -----MSVADALMLMPVFGDFV---LSLIALIITIMLIIQDNQKDRR-----                    |
| 229551349 Bacil Lactobacillus_rhamnosus_LMS2-1            | -----MSVADALMLMLVFGDFV---LSLIALIITIMLIIQDNQKDRR-----                    |
| 116496125 Bacil Lactobacillus_casei_ATCC_334              | -----MSVADALMLMLVFGGFI---LSLIALIVTIVVAILDSSKDRL-----                    |
| 191639567 Bacil Lactobacillus_casei_BL23                  | -----MSVADALMLMLVFGGFI---LSWIALIITIVVAILDNQKDRH-----                    |
| 224454503 Bacil Lactobacillus_paracasei_8700:2            | -----MSVTDALMLMLVFGGFI---LSLIALIITIVVAILDNQKDRH-----                    |
| 224454566 Bacil Lactobacillus_paracasei_8700:2            | -----MSVADALMLMLVFGGFI---LSLIALIVTIVVAILDNQKDRH-----                    |
| 191639590 Bacil Lactobacillus_casei_BL23                  | -----MSVADAITIMLAFGFSFV---LLLVGTVVILVRAILDNQKDRH-----                   |
| 116496086 Bacil Lactobacillus_casei_ATCC_334              | -----MSHAQNPVKGGVWLSVADAITIMLAFGFSFV---LLLVGTVVILVRAILDNQTD-----        |
| 224454531 Bacil Lactobacillus_paracasei_8700:2            | -----MSHAQNPVKGGVWLSVADAITIMLAFGFSFV---LLLVGTVVILVRAILDNQKDRH-----      |
| 224456139 Bacil Lactobacillus_paracasei_8700:2            | -----MSVAEAITLMLAFGFSFV---LSLVNTFVTLVKAMQDNQTD-----                     |
| 224456168 Bacil Lactobacillus_paracasei_8700:2            | -----MSVAEAITLMLAFGFSFV---LSLVNTFVTLVKAMQDNQKDRH-----                   |
| 227522667 Bacil Lactobacillus_hilgardii_ATCC_8290         | -----MSVSDAPQLAIGVGLLI---INLIGLVVELIKSQKNNRSLAELAIT-----                |
| 227362872 Bacil Lactobacillus_sakei_carnosus_DSM_15831    | -----MLSTDALQLMLLFGTLI---INLIALVVELIKNHQQKNNRLLSSGKLAVI-----            |
| 116618051 Bacil Leuconostoc_mesenteroides_mesenteroides   | -----MSVSDAVQLMLGFGTFV---LMLLGLVVELIKNSNKK-----                         |
| 116618195 Bacil Leuconostoc_mesenteroides_mesenteroides   | -----MSVSDTLQLMIFGTFV---LMLVGLVVELIKNSNKK-----                          |
| 116494107 Bacil Lactobacillus_casei_ATCC_334              | -----MSISDALQLMLGFGMFV---VALLALVVELIKNQKK-----                          |
| 191637424 Bacil Lactobacillus_casei_BL23                  | -----MSISDALQLMLGFGFV---VLLALVVELIKNQKK-----                            |
| 226820159 Bacil Lactobacillus_gasseri_MV-22               | -----MSVADALQLMLAFGTFI---VALIALVVELIKSQKK-----                          |
| 170016344 Bacil Leuconostoc_citreum_KM20                  | -----MSVSDALQLMFMFGTFI---VALLALVVELIKSQKK-----                          |
| 170016281 Bacil Leuconostoc_citreum_KM20                  | -----MSVSDALQLMLMFGTFI---VALLTLVVELIKNQKK-----                          |
| 160940345 Clost Clostridium_bolteae_ATCC_BAA-613          | -MPYAVTLLFCIISTGSSYCWVTSISERRWYNMSTYEALSLMIAFGVLI---VMIIGTKK-----       |
| 160940340 Clost Clostridium_bolteae_ATCC_BAA-613          | -----MTSISERGWYDMSTYETLSLMIAFGVLI---VMIIGTKK-----                       |
| 160940344 Clost Clostridium_bolteae_ATCC_BAA-613          | -MPYAVTKVFSIINTGSSYCWVTSISERGWYNMSTYEALSLMIAFGVLI---VMIIGTKK-----       |
| 199598668 Bacil Lactobacillus_rhamnosus_HN001             | ---MLNVNQERKYIEPLLVSKRHSSTFYIAAEMSDFEALSLMIMAALLL---IAVIELVLKLIIRD----- |
| 116493973 Bacil Lactobacillus_casei_ATCC_334              | -----MSIYEALSLMIMFGLFV---LGLITLVKLNDR-----                              |
| 29377692 Bacil Enterococcus_faecalis_V583                 | -----MNVSTKIYERRGLLSIAEALALMISFGSFI---ATLIFGILKVVVKEDKKK-----           |
| 194272132 Bacil Enterococcus_faecalis_OG1RF               | -----MSIAEALALMISFGSFI---ATLIFGILEAVKENNKK-----                         |
| 229547340 Bacil Enterococcus_faecalis_TX1332              | -----MNVSTKIYERRGLLSIAEALALMISFGSFI---ATLIFGILEAVKENNKK-----            |
| 218289529 Bacil Alicyclobacillus_acidocaldarius_LAA1      | -----MSDIGILLQMIQTGSLL---ITLLQFVLALVLMKRRK-----                         |
| 196249249 Bacil Geobacillus_sp-_G11MC16                   | -----MVMTIADALTLMIAFASLI---VAVIAVAKDKK-----                             |
| 221088255 Bacil Geobacillus_sp-_Y412MC61                  | -----MMTVAEALSMLMISFAPLV---VAVIAVSKKHPHTLLGLGEGGLLVPVSGP-----           |
| 228006493 Bacil Alicyclobacillus_acidocaldarius_subsp-    | -----MSVYDALSLVQFASLM---VAVLALVVTLVLALRRK-----                          |
| 228005982 Bacil Alicyclobacillus_acidocaldarius_subsp-    | -----MSVAEALSMLIQFGSFI---VTLTLVVALVTLKRRK-----                          |
| 218289522 Bacil Alicyclobacillus_acidocaldarius_LAA1      | -----MTVADALSMLIQFGSFI---VALTSLVALVALRRK-----                           |
| 218289238 Bacil Alicyclobacillus_acidocaldarius_LAA1      | -----MTVADAVSLAIQFGSFI---IALLSLVVALVALTRK-----                          |
| 228004480 Bacil Alicyclobacillus_acidocaldarius_subsp-    | -----MTVADALSLLIQFGSFI---MTCLSLVVALVALTRK-----                          |
| consensus/95%                                             | .....hph..sl.hhh.hu.hh...h.hl.hh.....                                   |
| consensus/90%                                             | .....hph.ts1.hhh.Fu.hh...h.ll.hhh.h.....                                |
| consensus/80%                                             | .....hoh.ps1tlhl.FG.hl...lslshlhth...p.....                             |
| <b>15612907 Bacil Bacillus_halodurans_C-125</b>           | -----MTVFEALMFAVAFATLI---IAVLSFHEKK-----                                |
| 47092607 Bacil Listeria_monocytogenes_str._4b_H7858       | -----MYSFTPGKELDLSVEALTLMIAFATLV---VLLIGFEQKK-----                      |
| 255016714 Bacil Listeria_monocytogenes_FSL_F2-515         | ----MVVASLFSKKEVMPMFFLFRLSWKGYAMTVEALSFAIAFATLV---LLISSQNEQKKNHT-----   |
| <b>29377706 Bacil Enterococcus_faecalis_V583_1</b>        | -----MTVFEALMLAIAFATLI---VKISNKNDKK-----                                |

# E

## Hok (selected)

```
90580669|Gamma|Vibrio_angustum_S14      --MRVLLAVRQGHKTVSITLLVALPRVRDDLCEIQYQVGTQPFKAVLAFEVV-
27367087|Gamma|Vibrio_vulnificus_CMCP6  -QVMPKKTALAALVVVCITAVIITALYTGSLCDIRYKQDQNDLSIKLAYEVR-
15800674|Gamma|Escherichia_coli_O157-H7_EDL933  ---MPQKTIIVGML--CLTMLLTWVVLHASPCEFRVSMWSEIAAFLQCKP--
212705715|Gamma|Providencia_rustigianii_DSM_4541  ----MTKYAMIAVVSICVTILGCSFLIKDRLSYLHIDNDNTVVQVKLDYEIN-
197283937|Gamma|Proteus_mirabilis_HI4320  ----MTKITLFGITVVVCTVLMFALIVGERLCSLNISNGNMVVQAILMCHQ--
223992212|Gamma|Providencia_rettgeri_DSM_1131  ----MAKIALLLGLVTVCLTVLCFSLLMQERLCSFSSISSGNTLVQATLSCDN--
227358566|Gamma|Yersinia_mirabilis_ATCC_29906  ----MTKLALIGLITVCI TVLCFLLRHERLCSFNISSGNTLVQANLSCDK--
172056019|Gamma|Proteus_mirabilis_HI4320  ----MTKYALIGLIAVCLTVLCFSLLMRDRLCSI SVNSGNTVVQATLSYEER-
157149415|Gamma|Escherichia_coli_E24377A  -----MFAVCATVLCFSLIFRERLCELNIHRGNTVVQVTLAYEARQ
9507717|Plasm|Plasmid_F                  -SKFMTKYALIGLLAVCATVLCFSLIFRERLCELNIHRGNTVVQVTLAYEARK
187736817|Gamma|Escherichia_coli_1520      -SKFMTKYALIGLLAVCATVLCFSLIFRERLCELNIHRGNTVVQVTLAYEARK
9507718|Plasm|Plasmid_F                  ----MTKYALIGLLAVCATVLCFSLIFRERLCELNIHRGNTVVQVTLAYEARK
217975709|Gamma|Shewanella_baltica_OS223  -DMPKRKTTTSLAIVCFLLAALALIRDDLCKVEYRNGAMLLNVVLAYEVRG
217980295|Gamma|Shewanella_baltica_OS223  -MPKRKTTTSLAIVCFLLAALALIRDDLCKVEYRNGAMLLNVVLAYEVRG
238764212|Gamma|Yersinia_kristensenii_ATCC_33638  ---MSQKLLKTAMI-CITAVLIWMI RSHLCEVHIKLGGAETAAFLQCKQQA
170769155|Gamma|Escherichia_albertii_TW07627  ----MSQKSLIAITTLCTVAILIWMMLRGSLSCEIRMSFWGAEFAAFLQCRQ--
168748214|Gamma|Escherichia_coli_O157-H7_str-_EC4113  ----MSQKSLITVTI-CMTVIFTIWMMLHGSLSCEFRRLNLWGAEFAAFLQCKQ--
156932349|Gamma|Cronobacter_sakazakii_ATCC_BAA-894  -GMKPLHYLLACLFMVCITILIFALMNQGTLCBELTIRSGSQEVAAKLACTGK-
209906156|Gamma|Enterobacter_cancerogenus_ATCC_35316  --MTPLKAALGTVSIIICLTIVIFAFINRCKLCELTIKSEHQEVAAKLACISG-
156935098|Gamma|Cronobacter_sakazakii_ATCC_BAA-894  -MAMKDNFTFWCIIVCVTVIMFTTSLRETLCLELRLRGAGMEIVASLACKPRE
157371511|Gamma|Serratia_proteamaculans_568  ---MRLKHVHSHLTVVCI TILIFWMI RDSLCELTIVYQENITILIRLACDVKR
227333763|Gamma|Citrobacter_youngae_ATCC_29220  -AMKQQRFRFITLIIICITVVLVVLITRKDLCEVRLKAGQTEVAVFTAYESE-
37526772|Gamma|Phototrhobdus_luminescens_TTO1  -TMKQQKAI FIAIVI-CIAALA AVLTRKDLCEVRI RSGQTEVAVFMDYEP-
15799696|Gamma|Escherichia_coli_O157-H7_EDL933  -AMKQHKVMIVALIVXCITAVVAALVTRKDLCEVHIRTGQTEVAVFTAYESE-
49175991|Gamma|Escherichia_coli_str-_K-12_MG1655  --MKQHKAMIVALIVICITAVVAALVTRKDLCEVHIRTGQTEVAVFTAYESE-
226955804|Gamma|Escherichia_sp-_1_1_43  -AMKQHKAMIVALIVICITAVVAALVTRKDLCEVHIRTGQTEVAVFTAYESE-
9632542|Caudo|Enterobacteria_phage_933W  -AMKQQKAMLIALIVICLTVIVTALVTRKDLCEVRI RTGQTEVAVFVDYESEK
9632541|Caudo|Enterobacteria_phage_933W  --MKQQKAMLIALIVICLTVIVTALVTRKDLCEVRI RTGQTEVAVFVDYESEK
16129521|Gamma|Escherichia_coli_str-_K-12_MG1655  --MKQQKAMLIALIVICLTVIVTALVTRKDLCEVRI RTGQTEVAVFTAYEPEE
15801499|Gamma|Escherichia_coli_O157-H7_EDL933  -AMKQQKAMLIALIVICLTVIVTALVTRKDLCEVRI RTGQTEVAVFTAYEPEE
9507499|Plasm|Plasmid_ColIb-P9           --MMPQRTFLMMLIVICVTILCFVMV RDSLCLVRLRQQGNTVLVATLAYEVKR
209906319|Gamma|Enterobacter_cancerogenus_ATCC_35316  -GM-PKRALLGLFLICTLLIFWVMV RDSLCELHFRQEKTELA AVLAYEAKR
152972428|Gamma|Klebsiella_pneumoniae_MGH_78578  -RGMPPKYLLFGLVVICFTILLLTWVMV RDSLCELQRRQGNIELVAF LACDIKQ
206580878|Gamma|Klebsiella_pneumoniae_342  ---MPQKYLLFGLVVICFTILLLTWVMV RDSLCELQLRQGDIELVAF LACDIKQ
226957115|Gamma|Escherichia_sp-_1_1_43  -LGMPPKYRLLSLIVICFTLLFFTWMI RDSLCELHIKQGSYELAAFLACNLKE
49176371|Gamma|Escherichia_coli_str-_K-12_sMG1655  ---MPQKYRLLSLIVICFTLLFFTWMI RDSLCELHIKQGSYELAAFLACNLKE
15804103|Gamma|Escherichia_coli_O157-H7_EDL933  -LGMPPKYRLLSLIVICFTLLFFTWMI RDSLCELHIKQGSYELAAFLACNLKE
15800295|Gamma|Escherichia_coli_O157-H7_EDL933  ---MLTKYALVAVIVLCLTVPGFTLLVGD SLCEFTVKERNIEFRAVLAYEPKK
15800296|Gamma|Escherichia_coli_O157-H7_EDL933  -INMLTKYALVAVIVLCLTVLGF TLLVGD SLCEFTVKERNIEFKAVLAYEPKK
110640812|Gamma|Escherichia_coli_536      -INMLTKYALVAVIVLCLTVLGF TLLVGD SLCEFTVKERNIEFKAVLAYEPKK
```

```

152971617|Gamma|Klebsiella_pneumoniae_MGH_78578      -QDMLTKYALVAIIVLCITVLGFTLLVHSSLCELSIKERNIEFKAVLAYESKK
206578783|Gamma|Klebsiella_pneumoniae_342          ---MLTKYALVAIIVLCITVLGFTLLVHSSLCELSIKERNIEFKAVLAYESKK
15803279|Gamma|Escherichia_coli_O157-H7_EDL933     ---MLTKYALVAIIVLCCTVLGFTLMVGDSDLCELSIRERGMIEFKAVLAYESKK
170765967|Gamma|Escherichia_albertii_TW07627      -----MLCFTVLGF TLMVGDSDLCELSIRERGMIEFKAVLAYESKK
145301477|Gamma|Aeromonas_salmonicida_A449        ---MFGKTAVVSLIVCITALGVISLVRDSDLCELEVHQGETEIRLNLAYEAKR
145301527|Gamma|Aeromonas_salmonicida_A449        ---MPGKTAVMALLIVCVTVLAF TALVRDSDLCELSVRQGGTEIRAYLAYEPRE
38703974|Gamma|Escherichia_coli_O157-H7_str-_Sakai  ---MKRNPVVCLLIICITILTFTLLTRQTLYELRFRDSDKEVAALMACTSR-
91210664|Gamma|Escherichia_coli_UTI89             ----LATTANPGPCE-SNTILFT-LTRQSLYELRFRDSDKEVAALMACTSR-
157369192|Gamma|Serratia_proteamaculans_568       ---MQQERVVLRMLIICITLIALMWITRGSLSCELRITLGDTEVAAILAYETEG
157372209|Gamma|Serratia_proteamaculans_568       -----MIICMTLIALMWITRGSLSCELRITLGDTEVAAILAYESKG
238760001|Gamma|Yersinia_aldovae_ATCC_35236       ---MPQKT FVLC LLIVCITVLAFTLITHKSLCELRRLKDNKEVAAILAYESER
206575599|Gamma|Klebsiella_pneumoniae_342        -MKLPSPNLLWCVLIVCLTLLAF TYLTRKSLCEIRYPVFIDEEMALFNADQDA
10955445|Gamma|Escherichia_coli                  -MKQPKNALTWCLLIVCCTLLIF TYLTRNRLCEVRLKGDREVTASLAYESNG
83404855|Gamma|Escherichia_coli                  -MKLPGNALIWCVLIVCCTLLIF TLLTRNRLCEVRLKGDYREVATMAYESGG
9507608|Plasm|Plasmid_R100                        -MKLPRSSLVWCVLIVCLTLLIF TYLTRKSLCEIRYRDGHREVAAFMAYESGK
222104868|Gamma|Escherichia_coli                  -----MCLTLLIF TYLTRKSLCEIRYRDGHREVAAFMAYESGK
157412188|Gamma|Escherichia_coli_APEC_O1          AMKMPNQPIVLCILIVCLTLLIF TWLTRNSLCELRMKDGTREVF AILAYESGK
18466663|Gamma|Salmonella_enterica_Typhi_str-_CT18 -MKLPNQPVVLCVLIVCLTLLIF TWLTRNSLCELRRLKDG TREVSAVMDYESGK
10957290|Gamma|Salmonella_enterica__Typhi         AMKLPNQPVVLCVLIVCLTLLIF TWLTRNSLCELRRLKDG TREVSAVMDYESGK
Consensus      .....p.hhh.h..lChThlhh.hhhttpLCphp...h.h .shhttp..

```

F

Ibs (selected)

|                      |         |         |           |                                      |
|----------------------|---------|---------|-----------|--------------------------------------|
| --FKYIILVILLALSSPAY  | 605479  | 605535  | NC_011852 | Haemophilus parasuis SH0165          |
| --FKYIILVILLVLSLPAY  | 1031977 | 1032033 | NC_010519 | Haemophilus somnus 2336              |
| --FKYIILVVFLLVSSPAY  | 33079   | 33135   | NC_008201 | Mannheimia phage phiMHaA1            |
| --FKIAIILVILLVVSSNAY | 1142163 | 1142219 | NC_011852 | Haemophilus parasuis SH0165          |
| --IKIILVLLLLVSSQPAY  | 152027  | 152083  | NC_000907 | Haemophilus influenzae Rd KW20       |
| --IKIILVLLLLVSSQPAY  | 214235  | 214291  | NC_007146 | Haemophilus influenzae 86-028NP      |
| --IKLILVLLLLVSSQPAY  | 608786  | 608842  | NC_009567 | Haemophilus influenzae PittGG        |
| --IKLILVLLLLVSSQPAY  | 513497  | 513553  | NC_009566 | Haemophilus influenzae PitTEE        |
| KLCYITITFVLLMLLSSPAY | 1186462 | 1186530 | NC_009566 | Haemophilus influenzae PitTEE        |
| KTLQIILILVLLLLVSSPAY | 1009618 | 1009680 | NC_010519 | Haemophilus somnus 2336              |
| KPLTIIIIILALLVVSSPAY | 259006  | 259062  | NC_010519 | Haemophilus somnus 2336              |
| --LFKALILILMLVMPAF   | 1008195 | 1008251 | NC_010519 | Haemophilus somnus 2336              |
| --LMKIFLIVLLLLSPAY   | 260948  | 261004  | NC_010519 | Haemophilus somnus 2336              |
| --LVKVLILILMLVSPAY   | 261404  | 261460  | NC_010519 | Haemophilus somnus 2336              |
| --LVRIILVILLVSSPAY   | 1143595 | 1143651 | NC_011852 | Haemophilus parasuis SH0165          |
| --MKCVIILVILLVSSPAY  | 687324  | 687380  | NC_009792 | Citrobacter koseri ATCC BAA-895      |
| --MKFVILVILLVSSPAY   | 3064331 | 3064387 | NC_011740 | Escherichia fergusonii ATCC 35469    |
| --MKILII-VLLVSSPAY   | 1001209 | 1001262 | NC_010498 | Escherichia coli SMS-3-5             |
| --MKILII-VLLVSSPAY   | 2196637 | 2196690 | NC_011740 | Escherichia fergusonii ATCC 35469    |
| --MKLVILVILLVSSPAY   | 3276253 | 3276309 | NC_011741 | Escherichia coli IA11                |
| --MKLVILVILLVSSPAY   | 3063955 | 3064011 | NC_011740 | Escherichia fergusonii ATCC 35469    |
| --MKLVILVILLVSSPAY   | 3649628 | 3649684 | NC_011751 | Escherichia coli UMN026              |
| --MKRLII-VLLVSSPAY   | 2190475 | 2190528 | NC_008253 | Escherichia coli 536                 |
| --MKSVIILVILLVSSPAY  | 2915661 | 2915717 | NC_011740 | Escherichia fergusonii ATCC 35469    |
| --MKWIII-VLLVSSPAY   | 2196964 | 2197017 | NC_011740 | Escherichia fergusonii ATCC 35469    |
| --MQQVILVILLVSSPAY   | 3285265 | 3285321 | NC_011149 | Salmonella enterica enterica SL483   |
| --MQQVILVILLVSSPAY   | 4348582 | 4348638 | NC_010067 | Salmonella enterica arizonae         |
| --MRFVILVILLVSSPAY   | 855795  | 855851  | NC_010468 | Escherichia coli ATCC 8739           |
| --MRLIII-VLLVSSPAY   | 1057068 | 1057121 | NC_010658 | Shigella boydii CDC 3083-94          |
| --MTSVIILVILLVSSPAY  | 786854  | 786910  | NC_010067 | Salmonella enterica arizonae         |
| --MKLVILVILLVSSPAY   | 3420382 | 3420438 | NC_010498 | Escherichia coli SMS-3-5             |
| --MKVVIILVILLVSSPAY  | 2171908 | 2171964 | NC_003198 | Salmonella enterica Typhi str. CT18  |
| --MRLVILVILLVSSPAY   | 3861330 | 3861386 | NC_002655 | Escherichia coli O157:H7 EDL933      |
| --MKVVIILVILLVSSPAY  | 2345568 | 2345624 | NC_011205 | Salmonella enterica CT_02021853      |
| --MRLVILVILLVSSPAY   | 3084404 | 3084460 | NC_009800 | Escherichia coli HS                  |
| --MKLIII-VLLVSSPAY   | 2383714 | 2383767 | NC_011748 | Escherichia coli 55989               |
| --MQQVILVILLVSSPAY   | 3324415 | 3324471 | NC_006905 | Salmonella entericaSC-B67            |
| --MKLIII-VLLVSSPAY   | 2240242 | 2240295 | NC_008563 | Escherichia coli APEC O1             |
| --MKLVILVILLVSSPAY   | 4001984 | 4002040 | NC_002655 | Escherichia coli O157:H7 EDL933      |
| --MKWIII-VLLVSSPAY   | 1739368 | 1739421 | NC_010468 | Escherichia coli ATCC 8739           |
| --MHQVILVILLVSSPAY   | 3409390 | 3409446 | NC_011205 | Salmonella entericaCT_02021853       |
| --MKILII-VLLVSSPAY   | 2190803 | 2190856 | NC_008253 | Escherichia coli 536                 |
| --MKVVIILVILLVSSPAY  | 2171812 | 2171868 | NC_011149 | Salmonella entericaSL483             |
| --MRLAIIIVLLVSSPAY   | 3282007 | 3282063 | NC_011748 | Escherichia coli 55989               |
| --MRLVILVILLVSSPAY   | 3074755 | 3074811 | NC_008253 | Escherichia coli 536                 |
| --MKLIII-VLLVSSPAY   | 2383386 | 2383439 | NC_011748 | Escherichia coli 55989               |
| --MRLVILVILLVSSPAY   | 3282399 | 3282455 | NC_011748 | Escherichia coli 55989               |
| --MKHVILVILLVSSPAY   | 2383054 | 2383110 | NC_011748 | Escherichia coli 55989               |
| --MKFVILVILLVSSPAY   | 3306927 | 3306983 | NC_008253 | Escherichia coli 536                 |
| --MKLVILVILLVSSPAY   | 3543516 | 3543572 | NC_011748 | Escherichia coli 55989               |
| --MKLLVIVLMLVLTTPLY  | 946840  | 946893  | CP001072  | Helicobacter pylori Shi470           |
| --MRL--VIVLMLVLTTPLY | 432397  | 432350  | CP001072  | Helicobacter pylori Shi470           |
| --MKLLVIVLMLVLTTPLY  | 931110  | 931163  | CP000241  | Helicobacter pylori HPAG1            |
| --MKLLVIVLMLVLTTPLY  | 931049  | 931102  | AE001439  | Helicobacter pylori J99              |
| --MKLLVIVLMLVLTTPLY  | 930742  | 930795  | AE001439  | Helicobacter pylori J99              |
| --MKLPLVIVLMLVLTTPLY | 442707  | 442654  | AE001439  | Helicobacter pylori J99              |
| --MKLLVIVLMLVLTTPLY  | 887193  | 887246  | FM991728  | Helicobacter pylori B38              |
| --MKLLAIVLMLVLTTPLY  | 403303  | 403356  | FM991728  | Helicobacter pylori B38              |
| --MKLLVIVLMLVLTTPLY  | 930625  | 930678  | CP001173  | Helicobacter pylori G27              |
| --MKLLAIVLMLVLTTPLY  | 415957  | 416007  | CP001173  | Helicobacter pylori G27              |
| --FKLIMIIVLMLVLTTPLY | 1648187 | 1648240 | CP001173  | Helicobacter pylori G27              |
| --MRL--VIVLMLVLTTPLY | 448662  | 448615  | CP001173  | Helicobacter pylori G27              |
| --MKLLVIVLMLVLTTPLY  | 962263  | 962316  | CP001217  | Helicobacter pylori P12              |
| --MRL--VIVLMLVLTTPLY | 447826  | 447779  | CP001217  | Helicobacter pylori P12              |
| --MKLSLIVLMLVLTTPLY  | 1284766 | 1284819 | AM260522  | Helicobacter acinonychis str. Sheeba |
| --MRL--VIVLMLVLTTPLY | 479869  | 479822  | AE000511  | Helicobacter pylori 26695            |
| --MRL--VIVLMLVLTTPLY | 1071947 | 1071994 | AE000511  | Helicobacter pylori 26695            |

# G

## TisB (all)

|                                |         |         |           |                                                                      |
|--------------------------------|---------|---------|-----------|----------------------------------------------------------------------|
| MSLVDIAILILKLIVAALQLLDAVLKFLR  | 12857   | 12943   | NC_009792 | Citrobacter koseri ATCC BAA-895                                      |
| MGAVDMVILILRLIVAILQLLDAVLKFLR  | 26581   | 26495   | NC_009436 | Enterobacter sp. 638                                                 |
| MSGVDLFIILILKLIVAVLQLLDAVLKFLR | 3899304 | 3899390 | NC_009778 | Enterobacter sakazakii ATCC BAA-894                                  |
| MSLVDIAILILKLIVAALQLLDAVLKFLR  | 27814   | 27728   | NC_010468 | Escherichia coli ATCC 8739                                           |
| MSLVDIAILILKLIVAALQLLDAVLKFLR  | 4170173 | 4170259 | NC_009801 | Escherichia coli E24377A                                             |
| MSLVDIAILILKLIVAALQLLDAVLKFLR  | 3883134 | 3883220 | NC_009800 | Escherichia coli HS                                                  |
| MNLVDIAILILKLIVAALQLLDAVLKFLR  | 3949160 | 3949246 | NC_010473 | Escherichia coli str. K-12 substr. DH10B                             |
| MNLVDIAILILKLIVAALQLLDAVLKFLR  | 3851576 | 3851662 | NC_000913 | Escherichia coli str. K-12 substr. MG1655                            |
| MNLVDIAILILKLIVAALQLLDAVLKFLR  | 3786862 | 3786776 | AC_000091 | Escherichia coli str. K-12 substr. W3110                             |
| MSLVDIAILILKLIVAALQLLDAVLKFLR  | 4644028 | 4644114 | NC_002695 | Escherichia coli O157:H7 str. Sakai                                  |
| MSLVDIAILILKLIVAALQLLDAVLKFLR  | 4713011 | 4713097 | NC_002655 | Escherichia coli O157:H7 EDL933                                      |
| MSLVDIAILILKLIVAALQLLDAVLKFLR  | 4130354 | 4130440 | NC_010498 | Escherichia coli SMS-3-5                                             |
| MSLVDIAILILKLIVAVLQLLDAVLKFLR  | 4073697 | 4073783 | NC_011740 | Escherichia fergusonii ATCC 35469                                    |
| MGGMDIILILKLMVAVLQLLDAVLKQFR   | 26378   | 26301   | NC_011283 | Klebsiella pneumoniae 342                                            |
| MGGMDIILILKLMVAVLQLLDAVLKQFR   | 4464305 | 4464382 | NC_009648 | Klebsiella pneumoniae subsp. pneumoniae MGH 78578                    |
| MSVVDITILILKLIVAALQLLDAVLKFLR  | 3783539 | 3783453 | NC_010067 | Salmonella enterica subsp. arizonae serovar 62:z4,z23:--             |
| MRVVDITILILKLIVAALQLLDAVLKFLR  | 3938099 | 3938185 | NC_006905 | Salmonella enterica subsp. enterica serovar Choleraesuis str. SC-B67 |
| MSVVDITILILKLIVAALQLLDAVLKFLR  | 3786643 | 3786729 | NC_006511 | Salmonella enterica serovar Paratyphi A str. ATCC 9150               |
| MSVVDITILILKLIVAALQLLDAVLKFLR  | 3922945 | 3923031 | NC_011149 | Salmonella enterica subsp. enterica serovar Agona str. SL483         |
| MSVVDITILILKLIVAALQLLDAVLKFLR  | 4031471 | 4031557 | NC_011205 | Salmonella enterica subsp. enterica serovar Dublin str. CT_02021853  |
| MSVVDITILILKLIVAALQLLDAVLKFLR  | 3825787 | 3825701 | NC_011274 | Salmonella enterica subsp. enterica serovar Gallinarum str. 287/91   |
| MSVVDITILILKLIVAALQLLDAVLKFLR  | 4012653 | 4012739 | NC_011083 | Salmonella enterica subsp. enterica serovar Heidelberg str. SL476    |
| MSVVDITILILKLIVAALQLLDAVLKFLR  | 3969028 | 3969114 | NC_011080 | Salmonella enterica subsp. enterica serovar Newport str. SL254       |
| MSVVDITILILKLIVAALQLLDAVLKFLR  | 3782322 | 3782408 | NC_011147 | Salmonella enterica enterica serovar Paratyphi A str. AKU_12601      |
| MSVVDITILILKLIVAALQLLDAVLKFLR  | 3946617 | 3946703 | NC_010102 | Salmonella enterica subsp. enterica serovar Paratyphi B str. SPB7    |
| MSVVDITILILKLIVAALQLLDAVLKFLR  | 3880235 | 3880321 | NC_011094 | Salmonella enterica enterica serovar Schwarzengrund str. CVM19633    |
| MSVVDITILILKLIVAALQLLDAVLKFLR  | 3835774 | 3835688 | NC_004631 | Salmonella enterica subsp. enterica serovar Typhi Ty2                |
| MSVVDITILILKLIVAALQLLDAVLKFLR  | 3850284 | 3850198 | NC_003198 | Salmonella enterica subsp. enterica serovar Typhi str. CT18          |
| MSVVDITILILKLIVAALQLLDAVLKFLR  | 3998444 | 3998530 | NC_003197 | Salmonella typhimurium LT2                                           |
| MSLVDIAILILKLIVAALQLLDAVLKFLR  | 3968862 | 3968776 | NC_010658 | Shigella boydii CDC 3083-94                                          |
| MSLVDIAILILKLIVAALQLLDAVLKFLR  | 3712508 | 3712422 | NC_007613 | Shigella boydii Sb227                                                |
| MSLVDIAILILKLIVAALQLLDAVLKFLR  | 3891354 | 3891440 | NC_007606 | Shigella dysenteriae Sd197                                           |
| MSLVDIAILILKLIVAALQLLDAVLKFLR  | 3875416 | 3875502 | NC_004741 | Shigella flexneri 2a str. 2457T                                      |
| MSLVDIAILILKLIVAALQLLDAVLKFLR  | 3933281 | 3933195 | NC_008258 | Shigella flexneri 5 str. 8401                                        |
| MSLVDIAILILKLIVAALQLLDAVLKFLR  | 3796569 | 3796655 | NC_007384 | Shigella sonnei Ss046                                                |
| MSVVDITILILKLIVAALQLLDAVLKFLR  | 3932891 | 3932977 | NC_012125 | Salmonella entericaenterica serovar Paratyphi C strain RKS4594       |
| MSVVDITILILKLIVAALQLLDAVLKFLR  | 3873101 | 3873187 | NC_011294 | Salmonella enterica subsp. enterica serovar Enteritidis str. P125109 |
| MSLVDIAILILKLIVAALQLLDAVLKFLR  | 4336773 | 4336859 | NC_011751 | Escherichia coli UMN026                                              |
| MSLVDIAILILKLIVAALQLLDAVLKFLR  | 4452494 | 4452580 | NC_011750 | Escherichia coli IAI39                                               |
| MSLVDIAILILKLIVAALQLLDAVLKFLR  | 4228573 | 4228659 | NC_011748 | Escherichia coli 55989                                               |
| MSLVDIAILILKLIVAALQLLDAVLKFLR  | 3924698 | 3924784 | NC_011741 | Escherichia coli IAI1                                                |
| MSLVDIAILILKLIVAALQLLDAVLKFLR  | 4102427 | 4102513 | NC_011415 | Escherichia coli SE11                                                |
| MSLVDIAILILKLIVAALQLLDAVLKFLR  | 4747132 | 4747218 | NC_011353 | Escherichia coli O157:H7 str. EC4115                                 |
| MNLVDIAILILKLIVAALQLLDAVLKFLR  | 3739909 | 3739995 | NC_012759 | Escherichia coli BW2952                                              |
| MGGMDIILILKLMVAVLQLLDAVLKQFR   | 5181738 | 5181815 | NC_012731 | Klebsiella pneumoniae NTUH-K2044                                     |

## H

### ShoB (all)

|                           |         |         |           |                                           |
|---------------------------|---------|---------|-----------|-------------------------------------------|
| MTDCRYLIKRVIKIIIAVLQLLLFL | 2705612 | 2705535 | NC_008253 | Escherichia coli 536                      |
| MTDCRYLIKRVIKIIIAVLQLLLFL | 2854277 | 2854200 | NC_008563 | Escherichia coli APEC O1                  |
| MTDCRYLIKRVIKIIIAVLQLLLFL | 1212726 | 1212803 | NC_010468 | Escherichia coli ATCC 8739                |
| MTDCRYLIKRVIKIIIAVLQLLLFL | 2963064 | 2962987 | NC_004431 | Escherichia coli CFT073                   |
| MTDCRYLIKRVIKIIIAVLQLLLFL | 2850000 | 2849923 | NC_009801 | Escherichia coli E24377A                  |
| MTDCRYLIKRAIKIIIAVLQLLLFL | 2738533 | 2738456 | NC_009800 | Escherichia coli HS                       |
| MTDCRYLIKRVIKIIIAVLQLLLFL | 2789984 | 2789907 | NC_010473 | Escherichia coli str. K-12 substr. DH10B  |
| MTDCRYLIKRVIKIIIAVLQLLLFL | 2698219 | 2698142 | NC_000913 | Escherichia coli str. K-12 substr. MG1655 |
| MTDCRYLIKRVIKIIIAVLQLLLFL | 2698853 | 2698776 | AC_000091 | Escherichia coli str. K-12 substr. W3110  |
| MTDCRYLIKRVIKIIIAVLQLLLFL | 3420580 | 3420503 | NC_002695 | Escherichia coli O157:H7 str. Sakai       |
| MTDCRYLIKRVIKIIIAVLQLLLFL | 3490419 | 3490342 | NC_002655 | Escherichia coli O157:H7 EDL933           |
| MTDCRYLIKRVIKIIIAVLQLLLFL | 2795418 | 2795341 | NC_010498 | Escherichia coli SMS-3-5                  |
| MTDCRYLIKRVIKIIIAVLQLLLFL | 2841944 | 2841867 | NC_007946 | Escherichia coli UTI89                    |
| MTDCRYLIKRVIKVVIIVLQLLLFL | 511367  | 511444  | NC_011740 | Escherichia fergusonii ATCC 35469         |
| MTDCRYLIKRVIKIIIAVLQLLLFL | 2735311 | 2735234 | NC_010658 | Shigella boydii CDC 3083-94               |
| MTDCRYLIKRVIKIIIAVLQLLLFL | 2597276 | 2597199 | NC_007613 | Shigella boydii Sb227                     |
| MTDCRYLIKRAIKIIIAVLQLLLFL | 2594263 | 2594186 | NC_007606 | Shigella dysenteriae Sd197                |
| MTDCRYLIKRVIKIIIAVLQLLLFL | 2697413 | 2697336 | NC_004337 | Shigella flexneri 2a str. 301             |
| MTDCRYLIKRVIKIIIAVLQLLLFL | 2690857 | 2690780 | NC_004741 | Shigella flexneri 2a str. 2457T           |
| MTDCRYLIKRVIKIIIAVLQLLLFL | 2693893 | 2693816 | NC_008258 | Shigella flexneri 5 str. 8401             |
| MTDCRYLIKRVIKIIIAVLQLLLFL | 2845461 | 2845384 | NC_007384 | Shigella sonnei Ss046                     |
| MTDCRYLIKRVIKIIIAVLQLLLFL | 2584024 | 2583947 | NC_012759 | Escherichia coli BW2952                   |
| MTDCRYLIKRVIKIIIAVLQLLLFL | 2991718 | 2991641 | NC_011751 | Escherichia coli UMN026                   |
| MTDCRYLIKRVIKIIIAVLQLLLFL | 2874716 | 2874639 | NC_011750 | Escherichia coli IAI39                    |
| MTDCRYLIKRVIKIIIAVLQLLLFL | 2923434 | 2923357 | NC_011748 | Escherichia coli 55989                    |
| MTDCRYLIKRVIKIIIAVLQLLLFL | 2765974 | 2765897 | NC_011741 | Escherichia coli IAI1                     |
| MTDCRYLIKRVIKIIIAVLQLLLFL | 2958999 | 2958922 | NC_011415 | Escherichia coli SE11                     |
| MTDCRYLIKRVIKIIIAVLQLLLFL | 3524697 | 3524620 | NC_011353 | Escherichia coli O157:H7 str. EC4115      |
| MTDCRYLIKRVIKIIIAVLQLLLFL | 2957223 | 2957146 | NC_011745 | Escherichia coli ED1a                     |
| MTDCRYLIKRVIKIIIAVLQLLLFL | 2737604 | 2737527 | NC_011742 | Escherichia coli S88                      |
| MTDCRYLIKRVIKIIIAVLQLLLFL | 2929861 | 2929784 | NC_011601 | Escherichia coli O127:H6 str. E2348/69    |



**Supplementary Figure S2.** Phylogenetic tree of the LdrD/Fst toxin family. Maximum likelihood (ML) phylogenetic tree was constructed from an alignment of non-identical by using the MOLPHY program (2) with the JTT substitution matrix to perform local rearrangement of an original Fitch tree (3). The sequences that are identical to those used for tree reconstruction were added to the tree manually and have zero branch length. Known representatives from the Ldr family of *E. coli* K12 and the Fst family of *E. faecalis* are highlighted.

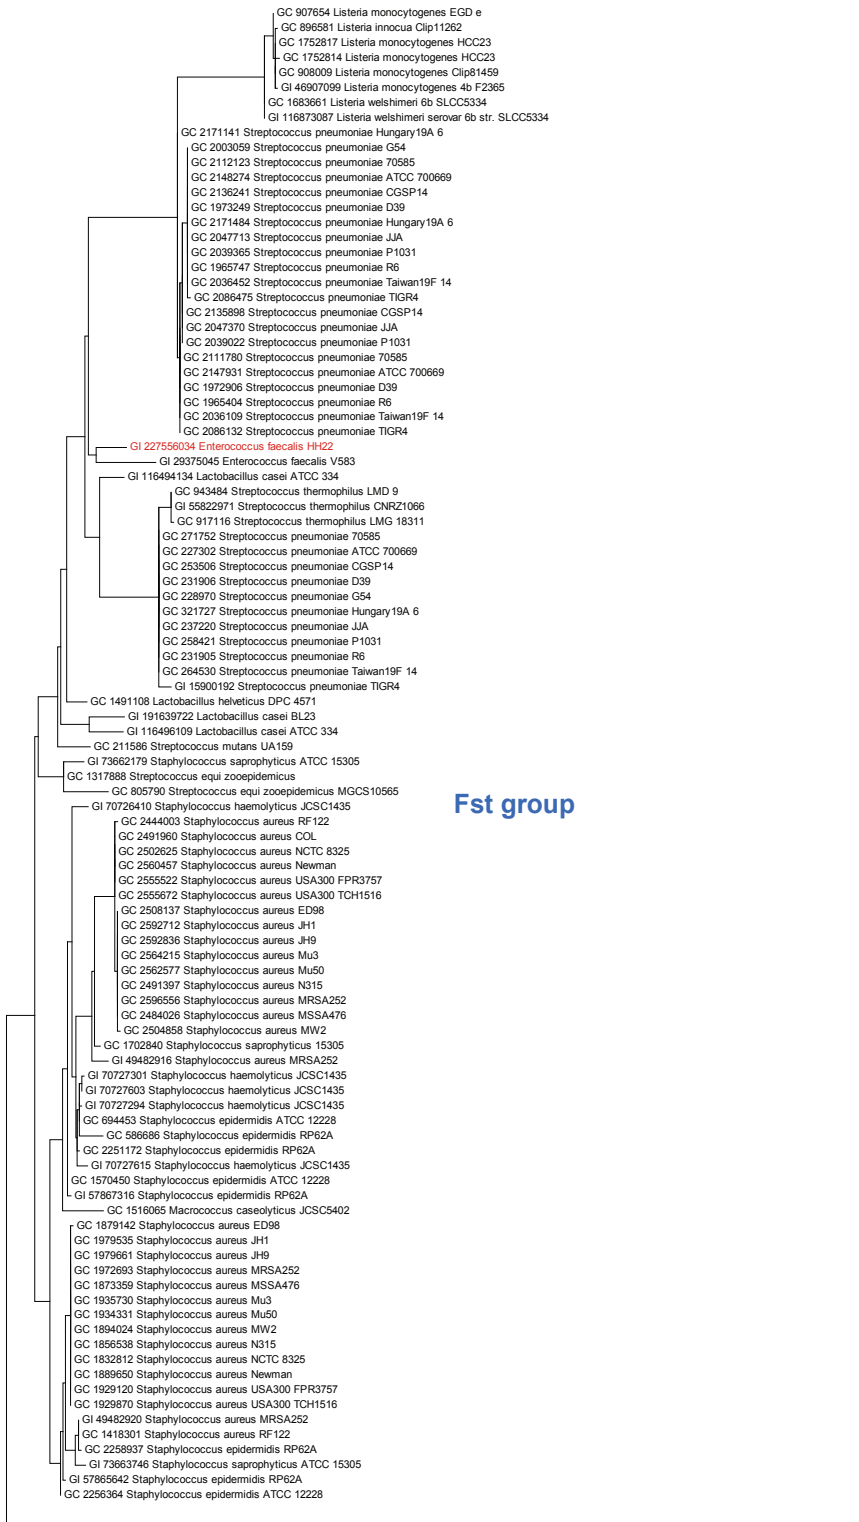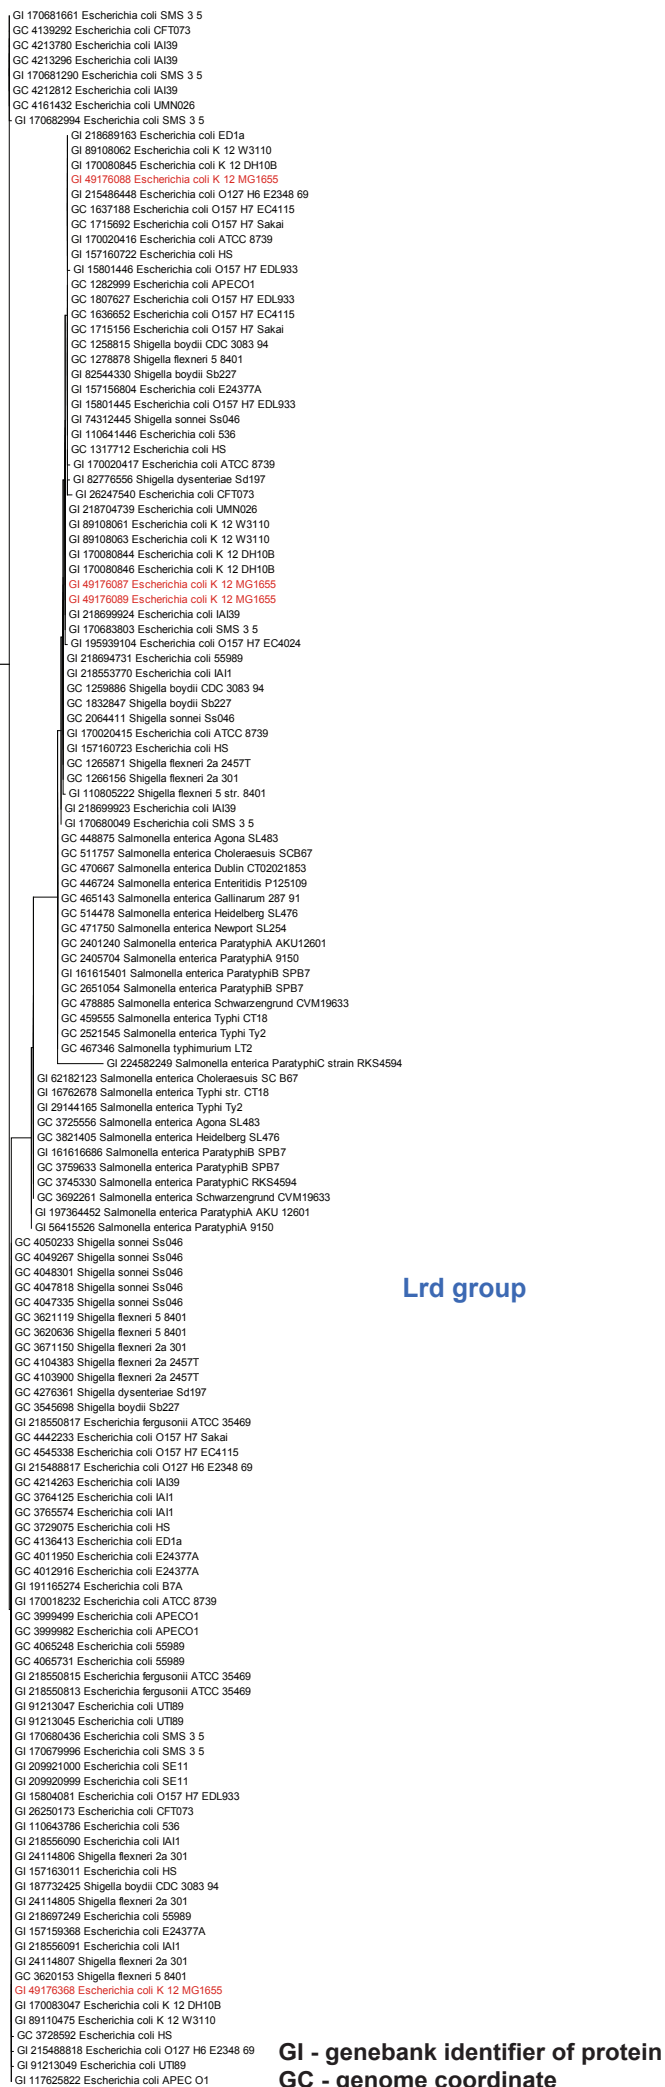

GI - genbank identifier of protein  
 GC - genome coordinate

**Supplementary Figure S3.** Phylogenetic tree of the Ibs toxin family. Maximum likelihood (ML) phylogenetic tree was constructed from an alignment of non-identical by using the MOLPHY program (2) with the JTT substitution matrix to perform local rearrangement of an original Fitch tree (3). The sequences that are identical to those used for tree reconstruction were added to the tree manually and have zero branch length. Known representatives from Ibs family of *E.coli* K12 are highlighted.

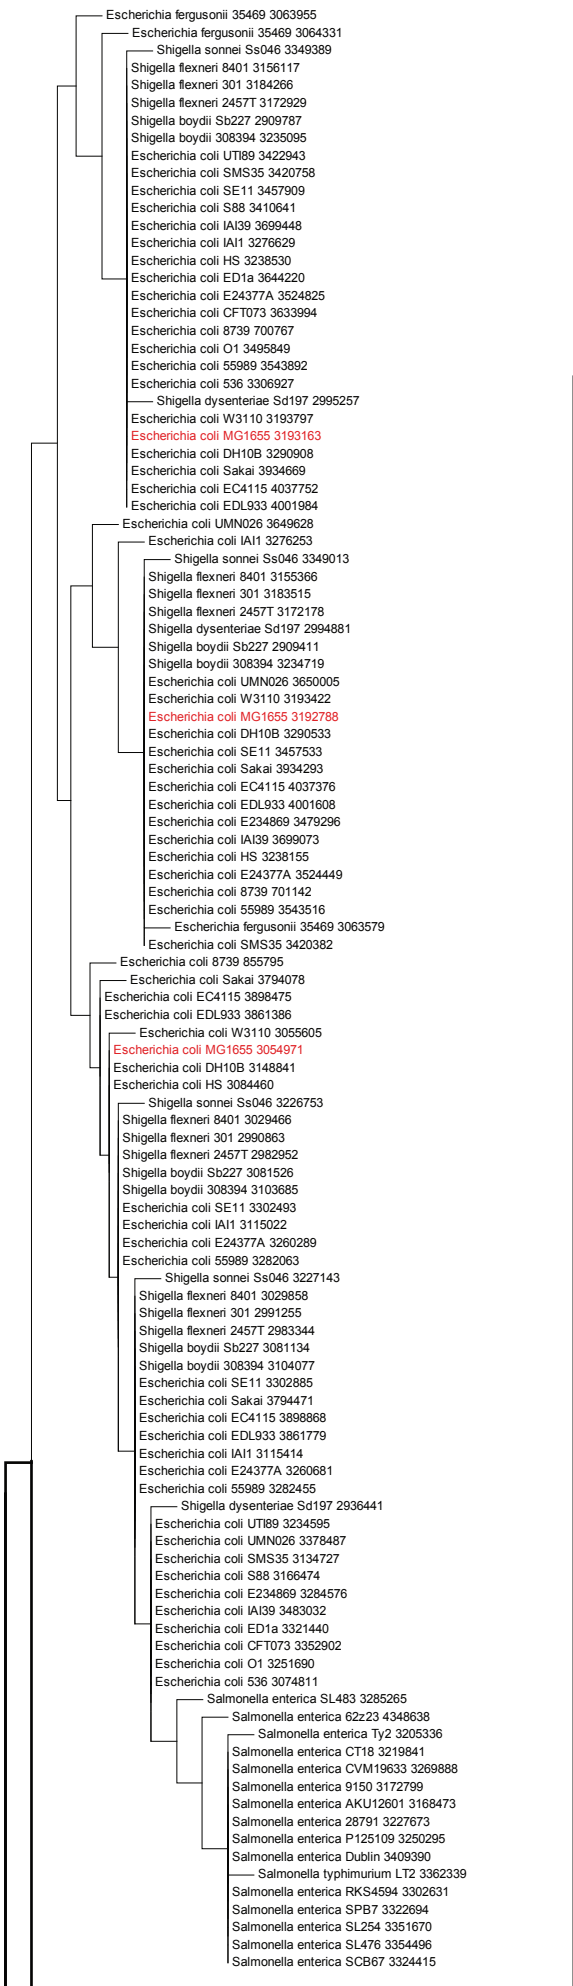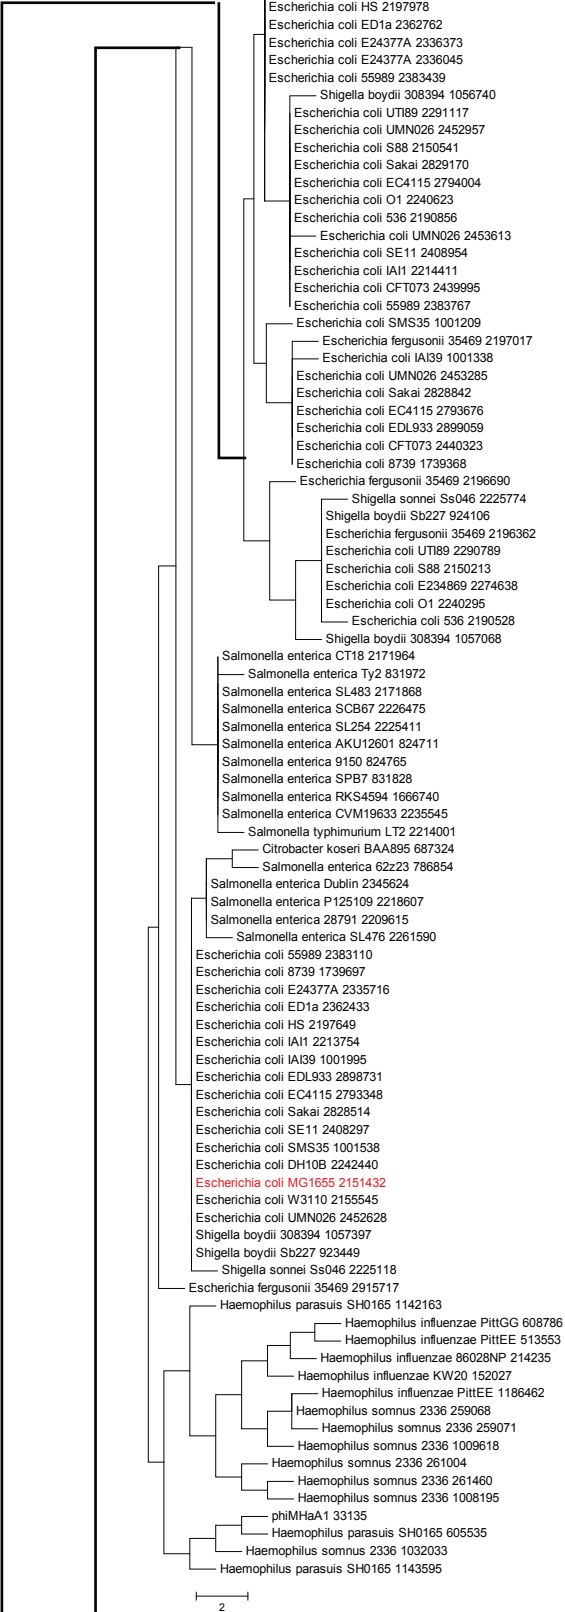

**Supplementary Figure S4.** Mapping of *z3289*-sRNA-1 and *z3290*-sRNA-2 toxin-antitoxin genes of *E. coli* O157:H7 EDL933. (A) Sequence of *yehI* and *yehL* intergenic region. Nucleotide coordinates are given on the left. The coding sequences of the toxins are colored in red and the sRNA sequences are colored in blue. The regions of complementarity between the toxins and antitoxin RNAs are shaded (light gray for *z3289*-sRNA-1 and dark gray for *z3290*-sRNA-2). The transcription start sites are indicated by the +1 and the corresponding -10 and -35 sequences are boxed. (B) Northern analysis detecting the expression of the *z3289* and *z3290* mRNAs. Total RNA (10 µg) isolated from *E. coli* O157:H7 EDL933 cells grown to OD<sub>600</sub> ≈ 0.4 (E) and OD<sub>600</sub> ≈ 5.0 (overnight, S) in LB medium and from cells grown to OD<sub>600</sub> ≈ 0.4 (E) and OD<sub>600</sub> ≈ 2.5 (overnight, S) in M9 media supplemented with 0.2% glucose were loaded in each lane. The labeled oligonucleotide used in the northern analysis cannot distinguish between the two highly homologous mRNAs. (C) Primer extension analysis of *z3289* and sRNA-1/sRNA-2. Primer extension assays were performed using total RNA isolated from *E. coli* O157:H7 cells grown in either LB media to OD<sub>600</sub> ≈ 0.4 (E) and OD<sub>600</sub> ≈ 5 (overnight, S) or in M9 media supplemented with 0.2% glucose to OD<sub>600</sub> ≈ 0.4 (E) and OD<sub>600</sub> ≈ 2.5 (overnight, S). Given the high degree of homology between the two sRNAs, we are unable to distinguish them by this assay.

## Supplementary Figure S4

### A

*yehK stop*

2953244 aaccaagaaatagaataaataactctagataattaaagtcgcagcacatgcaacttgaag  
ttggttctttatcttattatatgagatctattaatttcagcgtcgtgtacgttgaacttc

2953304 tatgacgagtatagctttcttaaaggggaaacgggtattcccccttagatgcgtttcaat  
atactgctcatatcgaaagaatttcccccttgccataagggggaatctacgcaaagtta

2953364 ttgccggttacttcaacaaatcaatcaaccgtaacagagccactaataactccagtacgg  
aacgggc

2953424 caatgagcacggttaacttttgtgtcagcgtgtccatccgctctccttattaaggagcgc  
gttactcgtgccaatgaaaacacagtcgcacaggtaggcgagaggaataattcctcgcg  
*z3289 start*

2953484 aacaccagcaccttacccttactgcctgtcgatactggtttacgtatgttggtacgaa  
ttgtggtcgtggaatgggaatgtgacggacagctatgaccaaatgcatacaaccatgctt

2953544 acgttgctctccggatcagggcaccgcctgcggcaccaccggtccggcagccaggactta  
tgcaacgagaggcctagtcctcgtggcggacgccgtggtgggcaggccggtcggctcctgaat

2953604 aaattggtccgatccggcacaacctccaacgggcaggattataaatctcactcactgaa  
tttaaccaggctaggccgtggtggagggttgcccgctcctaaatattagagtgagtgactt  
*+1 z3289 -10*

2953664 <sup>-35</sup> ttgcaatggagtgatgatggttataat<sup>-10</sup>ttattc<sup>+1 sRNA-1</sup>gttggtacgaaatggtgcacaatca  
aacgttacctcacacctataccaatattaataagcaaccatgctttacaacgtgtagt  
<sub>-35</sub>

2953724 gcaagttagcgtcactgtagtaataaaagaacctgcctcaccagcaggtttttttat  
cgttcaatcgcagtgacatcattttttttcttggacggagtggtcgtccaaaaataaa

2953784 tctgcatctactttccagatatttttttgccaatagcccaccataaatattcacatccc  
agacgctagatgaaaggctataaaaaaacggttatcgggtggtatttataagttaggg

2953844 ggtcaaattggtgcggtgaatataaaaatcgatgaatttataataaaaatgagttatatga  
ccagtttaccacgcaacttatatttttagctacttaaatatttatttttactcaatatact

2953904 tgaattaataaaaacagtaatcattttattaaagggggaagcggttttcccccttagatg  
acttaattatttttgtcattagtaaaataatttcccccttcgccaaaagggggaatctac

2953964 cgtttcaatttgcccgttacttcaacaaatcaatcaaccgtaacagagctactaatagct  
gcaaagttaaacgggcaatgaagttggttagttggtgattgtctcgatgattatcga

2954024 ccagtacagcaatgagcacggttaacttttgtgtcagcgagtccatccgctctccttatt  
ggatcatgtcgttactcgtgccaattgaaaacacagtcgctcaggtaggcgagaggaataa  
z3290 start

2954084 aaggagcgcacaccagcaccttaccttacactgcctgtcgatactggtttacgtatgt  
ttcctcgcggtgtggctcgtggaatgggaatgtgacggacagctatgaccaaatagcataca

2954144 tggaccacgatggtgcactccggatcagggcaccacctgcagcaccctccggttagc  
acctggtgctacaacgtgaggcctagtcctcgtggtagctcgtggggggcaggccatcg

2954204 caggacttgaaataggttcgatccggcgcacacgtcccaacagtcaggattataaatctca  
gtcctgaactttatccaagctaggccgcggtgcagggttgtcagtcctaatatttagagt  
+1 z3290 -10

2954264 ttatcttaattgcaacgggggtccagccgtggtataatcgttcgttgggaacacgatggt  
aatagaattaacgttgccccaggctcggcaccaatattaagcaagcaaccttgtgctacaa  
-35 -10 +1 SRNA-2  
-35

2954324 gcacaggctgtggtgtaggcctgaaaatagtaataaaagaacctgcctcaccagcagg  
cgtgtccgacaccacaatccggacttttatcattttttcttgacggagtggtcgtcc

2954384 tttttttatctactgtgatctgcttcccagatatttttcgctcaacaactaa  
aaaaaataaatgacactagacgaagggtctataaaaagcgagtttggtgatt



**B**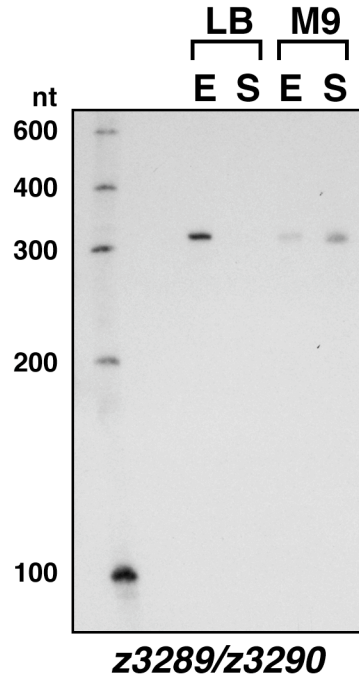**C**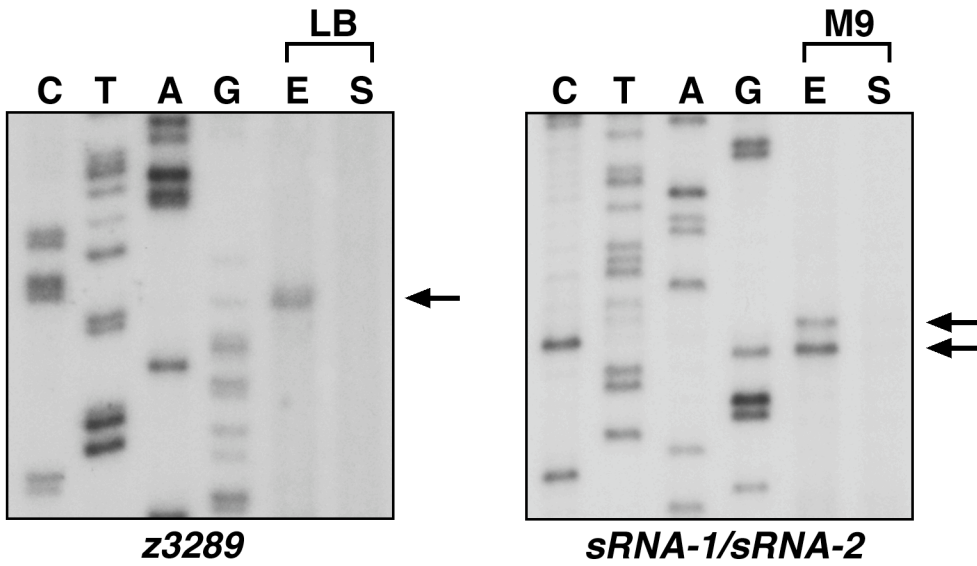

**Supplementary Figure S5.** Free energy plot analysis for experimentally characterized type I toxins of different families. Free energy profiles for RNA local secondary structures along nucleotide sequences in previously tested RNA antitoxin systems in *E.coli*, including the *E. coli* R plasmid (A-E) and *B.subtilis* (F). X axis: nucleotide positions; Y axis: free energy of RNA folding. Window lengths for free energy estimations corresponded to the lengths of RNA antitoxins in the system. Red arrows show the location of sRNA antitoxins.

## Supplementary Figure S5

**A** *E. coli* TisB

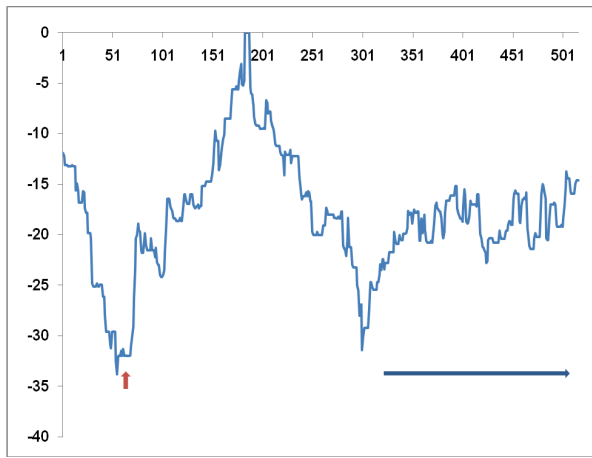

**B** R plasmid Hok

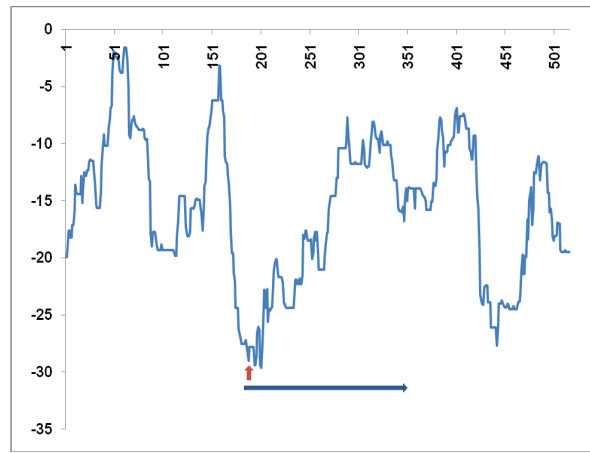

**C** *E. coli* lbsA, lbsB

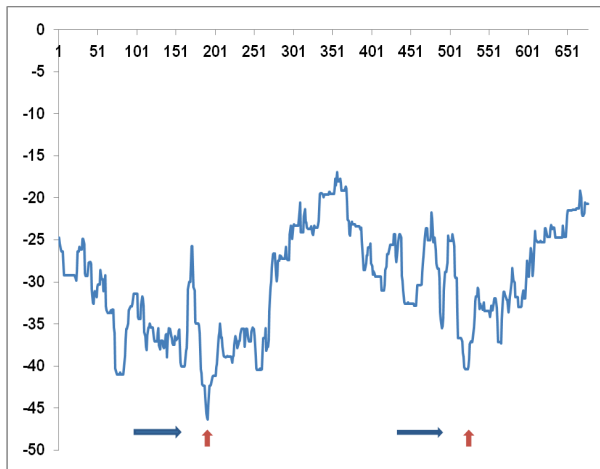

**D** *E. coli* ShoB

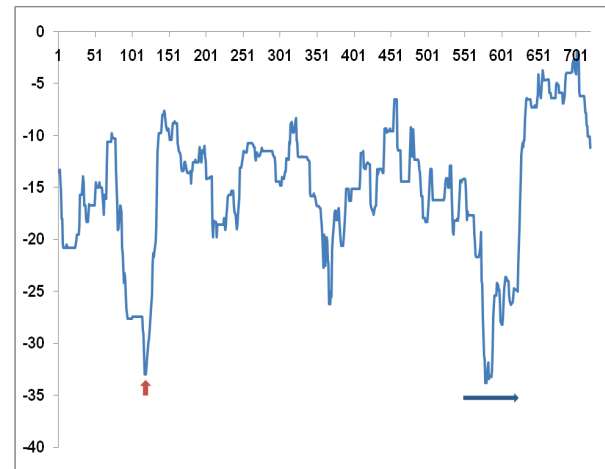

**E** *E. coli* LdrD

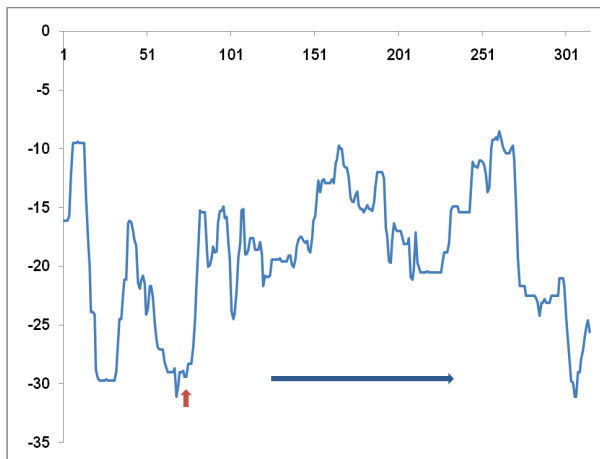

**F** *B. subtilis* TxpA

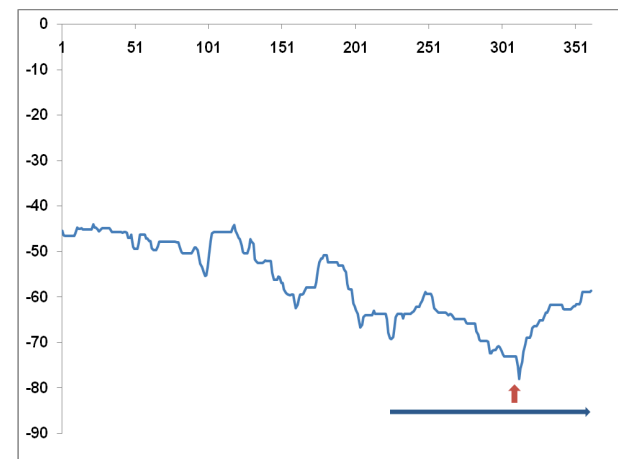

**Supplementary Figure S6.** Comparison of the free energy distributions for the antisense RNAs of type I toxins loci predicted in this study with random controls. Folding free energy estimations for the putative antisense RNAs, control sequences from the same genomes and randomly shuffled dinucleotide sequences were calculated using the Afold program (4). Di-shuffled controls are sequences with randomly shuffled dinucleotides, retaining nucleotide composition of native RNAs.

Supplementary Figure S6

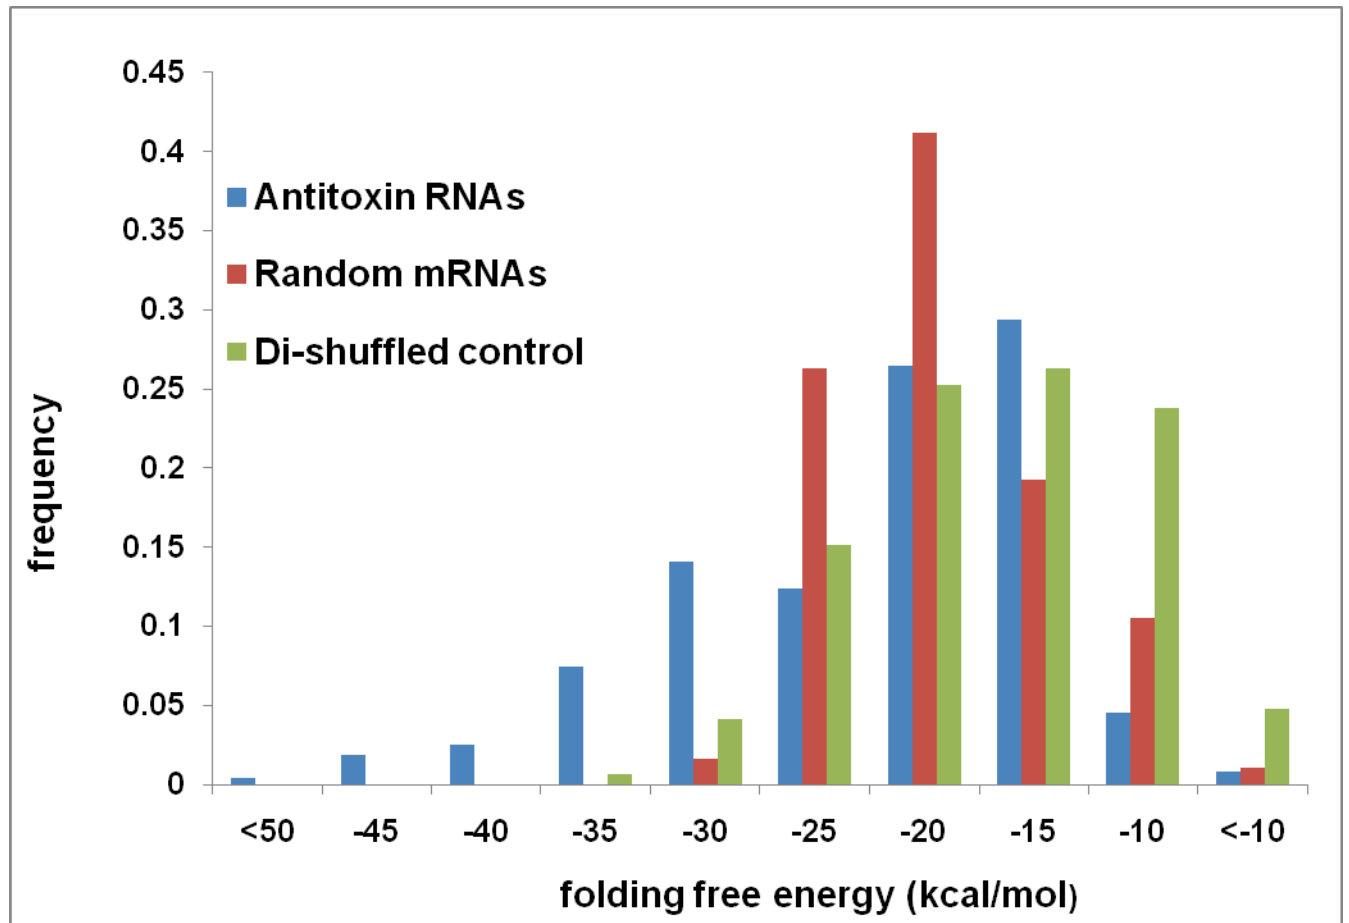

## REFERENCES

1. Edgar, R.C. (2004) MUSCLE: a multiple sequence alignment method with reduced time and space complexity. *BMC Bioinformatics*, **5**, 113.
2. Adachi, J. and Hasegawa, M. (1992), *Computer Science Monographs No. 27*, Institute of Statistical Mathematics, Tokyo.
3. Felsenstein, J. (1996) Inferring phylogenies from protein sequences by parsimony, distance, and likelihood methods. *Methods Enzymol.*, **266**, 418-427.
4. Ogurtsov, A.Y., Shabalina, S.A., Kondrashov, A.S. and Roytberg, M.A. (2006) Analysis of internal loops within the RNA secondary structure in almost quadratic time. *Bioinformatics*, **22**, 1317-1324.
