# Supplementary material for: Abundance of type I toxin–antitoxin systems in bacteria: searches for new candidates and discovery of novel families
Source: PubMed Central journal article supplement — Nucleic Acids Res. 2010 Feb 15;38(11):3743–59. doi: 10.1093/nar/gkq054 (PMC2887945; doi:10.1093/nar/gkq054), 2010-02-15
Supplement: gkq054_2.pdf [file gkq054_2.pdf]

**Supplementary Table S1.** Comparison of homology search results obtained by BLAST with default parameters and modifications of the search described in this work for 774 completely sequenced genome set.

| Starting query sequence (toxin name and GI number) | Number of hits identified by PSI-BLAST with default parameters <sup>a</sup> | Exhaustive PSI-BLAST | Number of hits identified by TBLASTN with default parameters <sup>b</sup> | Exhaustive TBLASTN |
|----------------------------------------------------|-----------------------------------------------------------------------------|----------------------|---------------------------------------------------------------------------|--------------------|
| HokC<br>49175991                                   | 94                                                                          | 117                  | n/a                                                                       | n/a                |
| TxpA<br>1730974                                    | 1                                                                           | 48 <sup>c</sup>      | n/a                                                                       | n/a                |
| LdrD<br>49176368                                   | 53                                                                          | 82 <sup>d</sup>      | n/a                                                                       | n/a                |
| Fst<br>256852532                                   | 0                                                                           |                      | n/a                                                                       | n/a                |
| IbsA<br>226524729                                  | n/a                                                                         | n/a                  | 0 (identical self-hit has E-value=0.9)                                    | 149                |
| TisB<br>162416093                                  | n/a                                                                         | n/a                  | 31                                                                        | 35                 |
| ShoB<br>226524739                                  | n/a                                                                         | n/a                  | 14                                                                        | 21                 |

<sup>a</sup>PSI-BLAST default parameters: database = Refseq at NCBI; matrix = BLOSUM62; word size = 3; gap cost = existence 11, extension 1; PSI-BLAST inclusion threshold = 0.005; expect threshold = 100; no low complexity filtering; conditional compositional score matrix adjustment; no composition based statistics (1); iterations run until convergence (no more new hits detected above the inclusion threshold). Only hits with E-value less or equal 0.005 were considered as statistically significant.

<sup>b</sup>TBLAST with default parameters: Same as PSI-BLAST but no iterations run.

<sup>c</sup>This number only includes representatives found by exhaustive PSI-BLAST searches using the Refseq database and *Bacillus subtilis* TxpA as a starting query. 118 homologs, including the *Enterococcus faecalis* subfamily, are found when using the NR database.

<sup>d</sup>This number includes representatives of both Fst and Ldr families which we consider to be homologous. With the addition of homologs found by exhaustive TBLASTN the number of identified Ldr/Fst family members is twice as large (196 in total); see Supplementary Table 6.

**Supplementary Table S2.** Sequence and gene features of known type I toxins

## Analysis of upstream and downstream distances

| Family                     | Upstream distance | Downstream distance | Alignment core length |
|----------------------------|-------------------|---------------------|-----------------------|
| Ibs                        | 1181              | 708                 | 18                    |
| Hok                        | 453               | 415                 | 50                    |
| LdrD                       | 650               | 702                 | 33                    |
| TxpA                       | 492               | 608                 | 35                    |
| TisB                       | 749               | 282                 | 29                    |
| ShoB                       | 877               | 534                 | 26                    |
| <b>Selected parameters</b> | <b>400</b>        | <b>250</b>          | <b>70</b>             |

## Analysis of 10 C-terminal amino acids for 175 proteins in selected genomes

| Amino acid | Counts (absolute frequencies) |
|------------|-------------------------------|
| C          | 15                            |
| H          | 18                            |
| Q          | 24                            |
| D          | 35                            |
| G          | 36                            |
| T          | 41                            |
| P          | 52                            |
| W          | 68                            |
| F          | 71                            |
| E          | 79                            |
| Y          | 92                            |
| S          | 95                            |
| R          | 98                            |
| N          | 100                           |
| K          | 193                           |

**Supplementary Table S3.** Strains and plasmids used in this study

| Name                                            | Relevant genotype or description                                               | Source or reference |
|-------------------------------------------------|--------------------------------------------------------------------------------|---------------------|
| Strains                                         |                                                                                |                     |
| <i>Escherichia coli</i> MG1655                  | <i>E. coli</i> F <sup>-</sup> $\lambda$ <i>ilvG</i> <i>rfb-50</i> <i>rph-1</i> | lab stock           |
| <i>Escherichia coli</i> EDL933                  | Wild type EHEC, O157:H7                                                        | D. Friedman         |
| <i>Streptococcus pneumoniae</i> R6              | Avirulent laboratory strain                                                    | W. Haas             |
| <i>Bacillus subtilis</i> PY79                   |                                                                                | E. Hobbs, (2)       |
|                                                 | Wild type                                                                      |                     |
| <i>Bacillus subtilis sub. subtilis</i> str. 168 |                                                                                | K. Ramamurthi, (2)  |
|                                                 | Wild type                                                                      |                     |
| <i>Enterococcus faecalis</i> OG1RF              | Laboratory strain; Rif <sup>R</sup> , Fus <sup>R</sup>                         | J. Lemos            |
| Plasmids                                        |                                                                                |                     |
| pAZ3                                            | Cm <sup>R</sup>                                                                | (3)                 |
| pDR111                                          | Ap <sup>R</sup>                                                                | (4)                 |

**Supplementary Table S4.** Oligonucleotides used in this study

| Name  | Sequence (5'-3', restriction sites underlined) | Use                                                          |
|-------|------------------------------------------------|--------------------------------------------------------------|
| EF427 | GCCCTTAACTATGGCACTAGTTAGGGGCTTTGG              | Antisense to <i>fst-B S. pneumoniae</i><br>Northern analysis |
| EF507 | CTTGCTGATTGTGCAACATTTTCGTACC                   | sRNA-1<br>Northern analysis                                  |
| EF514 | CACCACAGCCTGTGCAACATCGTGTTTC                   | sRNA-2<br>Northern analysis                                  |
| EF512 | TGTCCATCCGCTCTCCTTATTAAGGAGCGC                 | <i>z3289/z3290</i><br>Northern analysis                      |
| EF524 | GTTGGTACGAAACGTTGCTCTCCG                       | <i>z3289</i><br>Primer extension                             |
| EF506 | CCTGCTGGTGAGGCAGGTTCTTTTATTT                   | sRNA-1/sRNA-2<br>Primer extension                            |
| EF472 | GATTATCATCGGCGCTTCTTGGCTGTAC                   | Antisense to <i>yhxE-2 B. subtilis</i><br>Northern analysis  |
| EF470 | CGGTCTACCCGAGAGCGTATGTCTAGTACGCTC              | Antisense to <i>txpA E. faecalis</i><br>Northern analysis    |
| EF486 | TCCCCCTCCCCCTGGTGTCTTAGTAAGCC                  | Antisense to <i>yonT B. subtilis</i><br>Northern analysis    |
| EF398 | TATACTGAATTCGTCATCGGTTACCGATTACGTTCC           | pAZ3- <i>fst-B</i><br>PCR                                    |
| EF399 | GAACACAAGCTTCCCTAACTAGTGCCATAGTTAAGGGC         | pAZ3- <i>fst-B</i><br>PCR                                    |
| EF390 | CCGGAGGAATTCATCGTGGTCCAACATACGTAAACC           | pAZ3- <i>z3290</i><br>PCR                                    |
| EF391 | CGATGA AAGCTTAAATAAAAAATGAGTTATATGATG          | pAZ3- <i>z3290</i><br>PCR                                    |
| EF441 | CTGTAAGCTAGCTTTAAATAAAGGGCATTCTGTCTAG          | pDR111- <i>yhxE-2</i><br>PCR                                 |
| EF494 | GCATAGGCATGCATTAAGCAGCTATGCTTTTTTATG           | pDR111- <i>yhxE-2</i><br>PCR                                 |
| EF437 | GTATAATAGGCTAGCGAAGCTACCTTAGCTTATCCTC          | pDR111- <i>txpA B. subtilis</i><br>PCR                       |
| EF438 | CATTAC GCATGC ACCACTTGTTAATGTGTGTTAC           | pDR111- <i>txpA B. subtilis</i><br>PCR                       |
| EF429 | GTTATAGAATTC AAGTAGGAAGTTTATGACGGTGGCAATTC     | pAZ3- <i>txpA E. faecalis</i><br>PCR                         |
| EF430 | GTATAAAAGCTTCGAAGAGAGCGTACTAGACATACGCTC        | pAZ3- <i>txpA E. faecalis</i><br>PCR                         |
| EF473 | CCATCCGAATTCACACAAATAACTTACCACAAATAT           | pAZ3- <i>yonT</i><br>PCR                                     |
| EF474 | CATTA AAAGCTTGCCAATGAATGTGATATGGGTAAACC        | pAZ3- <i>yonT</i><br>PCR                                     |

**Supplementary Table S5.** Complete list of type I toxins in completely sequenced genomes identified by BLAST approach. (Separate .xls file)

**Supplementary Table S6.** Distribution of type I toxin families in 774 completely sequenced microbial genomes. (Separate .xls file)

**Supplementary Table S7.** Results of tandem ORF search in  $\gamma$ -Proteobacteria and Firmicutes. (Separate .xls file)

**Supplementary Table S8.** Results of search for characteristic sequence features of type I toxins in  $\gamma$ -Proteobacteria and Firmicutes. (Separate .xls file)

**Supplementary Table S9.** The data for predicted antitoxin RNA regions used for comparison with random sequences. (Separate .xls file)

## REFERENCES

1. Schäffer, A.A., Aravind, L., Madden, T.L., Shavirin, S., Spouge, J.L., Wolf, Y.I., Koonin, E.V. and Altschul, S.F. (2001) Improving the accuracy of PSI-BLAST protein database searches with composition-based statistics and other refinements. *Nucleic Acids Res.*, **29**, 2994-3005.
2. Zeigler, D.R., Prágai, Z., Rodriguez, S., Chevreux, B., Muffler, A., Albert, T., Bai, R., Wyss, M. and Perkins, J.B. (2008) The origins of 168, W23, and other *Bacillus subtilis* legacy strains. *J. Bacteriol.*, **190**, 6983-6995.
3. Kawano, M., Aravind, L. and Storz, G. (2007) An antisense RNA controls synthesis of an SOS-induced toxin evolved from an antitoxin. *Mol. Microbiol.*, **64**, 738-754.
4. van Ooi, j.C. and Losick, R. (2003) Subcellular localization of a small sporulation protein in *Bacillus subtilis*. *J. Bacteriol.*, **185**, 1391-1398.
